# Supplementary material for: Ultra-processed food consumption and non-alcoholic fatty liver disease, metabolic syndrome and insulin resistance: A systematic review
Source: PubMed Central journal article supplement — JHEP Rep. 2023 Nov 17;6(1):100964. doi: 10.1016/j.jhepr.2023.100964 (PMC10792654; doi:10.1016/j.jhepr.2023.100964), 2023-11-17
Supplement: mmc4.pdf [file mmc4.pdf]

# Ultra-processed food consumption and non-alcoholic fatty liver disease, metabolic syndrome and insulin resistance: A systematic review

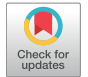

Laura Sol Grinshpan,<sup>1,2</sup> Sigal Eilat-Adar,<sup>3</sup> Dana Ivancovsky-Wajcman,<sup>1,2</sup> Revital Kariv,<sup>2,4</sup> Michal Gillon-Keren,<sup>5,6</sup> Shira Zelber-Sagi<sup>1,2,\*</sup>

<sup>1</sup>School of Public Health, Faculty of Social Welfare and Health Sciences, University of Haifa, Haifa, Israel; <sup>2</sup>Department of Gastroenterology Tel-Aviv Medical Center, Tel-Aviv, Israel; <sup>3</sup>The Academic College Levinsky-Wingate, Netanya, Israel; <sup>4</sup>Faculty of Medicine, Tel-Aviv University, Tel-Aviv, Israel; <sup>5</sup>Institute of Endocrinology and Diabetes, Schneider Children's Medical Center, Petah Tikva, Israel; <sup>6</sup>Faculty of Sciences, Kibbutzim College of Education Technology and the Arts, Tel-Aviv, Israel

JHEP Reports 2024. <https://doi.org/10.1016/j.jhepr.2023.100964>

**Background:** High ultra-processed food (UPF) consumption is associated with the development of various diet-related non-communicable diseases, especially obesity and type 2 diabetes. The present study aimed to systematically review the association between UPF consumption and non-alcoholic fatty liver disease (NAFLD) and its leading risk factors; metabolic syndrome (MetS) and insulin resistance (IR).

**Methods:** A comprehensive search was conducted in PubMed, Scopus, Embase, Web of Science, CINAHL, and Cochrane (March 2023), and references of the identified articles were checked. The search keywords were defined through an exploratory investigation in addition to MeSH and similarly controlled vocabulary thesauruses. Observational and interventional studies were included. Studies that focused only on specific groups of processed foods or overlapping dietary patterns were excluded. The quality assessment was conducted using the Joanna Briggs Institute's critical appraisal tools for observational studies and Cochrane's risk of bias 2 tool for randomized-control trials. A narrative synthesis was employed to report the results.

**Results:** Fifteen studies were included, with a total of 52,885 participants, one randomized-controlled trial, and fourteen observational studies (nine cross-sectional and five prospective). The review has shown a significant association between UPF consumption and NAFLD in three studies out of six, MetS in five out of eight, and IR in one out of three. All large-scale prospective cohorts that studied NAFLD or MetS outcomes demonstrated a positive association. In contrast, studies that did not demonstrate significant associations were mostly cross-sectional and small. The evidence for an association with IR was insufficient and conflicting.

**Conclusion:** The included studies are few, observational, and based upon self-reported dietary assessment tools. However, current evidence indicates that UPF is not only associated with obesity and type 2 diabetes but may also be a risk factor for NAFLD and MetS. UPF is a worldwide concern deserving further longitudinal research.

**Impact and implications:** Overconsumption of ultra-processed food (UPF) may lead to the development of obesity and type 2 diabetes, but the association with non-alcoholic fatty liver disease (NAFLD) is not well established. The present systematic review shows that UPF may be associated with NAFLD, although more large prospective studies are needed. These findings emphasize the importance of minimizing the consumption of UPF to prevent NAFLD and other metabolic diseases among the general adult population. This systematic review and further prospective studies, epidemiological or interventional, can help physicians provide patients with evidence-based nutritional recommendations and will support policymakers in restricting the marketing of UPF as well as promoting affordable, healthy, and minimally processed foods.

© 2023 The Author(s). Published by Elsevier B.V. on behalf of European Association for the Study of the Liver (EASL). This is an open access article under the CC BY-NC-ND license (<http://creativecommons.org/licenses/by-nc-nd/4.0/>).

## Introduction

Non-alcoholic fatty liver disease (NAFLD), recently renamed metabolic dysfunction-associated steatotic liver disease (MASLD),<sup>1</sup> is the most common chronic liver disease worldwide, and according to a

recent meta-analysis, it has an estimated overall global prevalence of 32.4% (95% CI 29.9-34.9%) among the adult population.<sup>2</sup> The NAFLD spectrum includes hepatic steatosis and progression to non-alcoholic steatohepatitis (NASH), fibrosis, and cirrhosis.<sup>3</sup> Moreover, it is a multi-system disease that interacts with many metabolic pathways and is closely associated with metabolic syndrome (MetS),<sup>4,5</sup> insulin resistance (IR), type 2 diabetes (T2D), and obesity.<sup>6-8</sup> The global prevalence of NAFLD, according to two meta-analyses, was estimated at 75.3% (95% CI 70.9-79.2%) among the obese population<sup>9</sup> and 55.5% (95% CI 47.3-63.7%) among patients with T2D.<sup>10</sup> Moreover, while no meta-analysis was conducted, a

Keywords: ultra-processed food; fatty liver; metabolic syndrome; insulin resistance; systematic review.

Received 10 July 2023; received in revised form 12 October 2023; accepted 31 October 2023; available online 17 November 2023

\* Corresponding author. Address: School of Public Health, Faculty of Social Welfare and Health Sciences, University of Haifa, 199 Aba Khoushy Ave., Haifa 3498838, Israel. E-mail address: [szelber-s@univ.haifa.ac.il](mailto:szelber-s@univ.haifa.ac.il) (S. Zelber-Sagi).

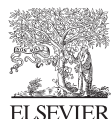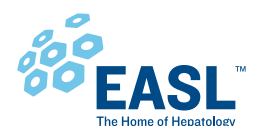

recent systematic review found that NAFLD prevalence was significantly higher among people with MetS and increased with the number of MetS criteria.<sup>11</sup> Other well-established key lifestyle factors associated with NAFLD include lack of physical activity, high sedentary behavior,<sup>12</sup> and poor nutritional intake.<sup>13</sup> Moreover, current strategies for treating and preventing NAFLD focus on lifestyle changes, weight reduction, and controlling comorbid conditions associated with NAFLD pathogenesis, such as IR, dyslipidemia, and T2D.<sup>14</sup> A large number of studies have been conducted to assess the relationship between NAFLD and overall dietary patterns,<sup>15–17</sup> as well as different nutritional components,<sup>18–20</sup> implicating saturated fatty acids (SFAs)<sup>21–23</sup> and added fructose, mainly in the form of sucrose (*i.e.* table sugar) and high-fructose corn syrup (HFCS),<sup>24,25</sup> as major risk factors. Among the leading sources of these nutrients in the modern diet are ultra-processed foods and drinks (UPF), made of contents derived from foods and additives, undergoing multiple industrial processes to create the final product.<sup>26</sup> UPF contain characteristic ingredients of no or rare other culinary use (such as HFCS and hydrogenated oils) and tend to be high in energy, salt, sugars (mainly fructose or HFCS), and fat (in particular SFAs), with low nutritional value.<sup>27</sup> Furthermore, UPF is usually very easy to use, durable, and hyper-palatable.<sup>28</sup> These characteristics, among other things, have led to a significant increase in UPF consumption over the last few decades,<sup>29–31</sup> accounting for over 50% of mean energy intake in the UK<sup>32</sup> and the US,<sup>33</sup> 30% in Mexico,<sup>34</sup> and 21.5% in Brazil<sup>35</sup> for both children and adults. The association between the dietary share of UPF and the risk of various diet-related non-communicable diseases (NCDs) was broadly investigated, indicating an association with T2D, cardiovascular diseases, cancer, as well as MetS, obesity and all-cause mortality.<sup>27,36</sup> The association of UPF with obesity and T2D is well established and was recently systematically reviewed.<sup>36–41</sup> While the evidence is gradually increasing, there remains a need for further high-quality studies on the association between UPF consumption and NAFLD, as well as its major risk factors, MetS and IR. Therefore, a systematic review on the association between UPF consumption and NAFLD, MetS, and IR was conducted. Moreover, in order to cover a broader perspective, a comprehensive literature summary was conducted on the association between UPF consumption and obesity and T2D.

## Materials and methods

This study was submitted to the International Prospective Register of Systematic Reviews – PROSPERO (CRD42023397579) and conducted according to the PRISMA (Preferred Reporting Items for Systematic Reviews and Meta-analysis) guidelines<sup>42</sup> (for the full PRISMA 2020 checklist, see [Table S1](#)).

### Search strategy

The systematic literature search was completed in March 2023, with the assistance of the University of Haifa library service for systematic reviews. The search was conducted in the following databases: PubMed, Scopus, Embase, Web of Science, CINAHL, and Cochrane ([Table S2](#)). Further studies were searched non-systematically on Google Scholar and by checking the references of the identified articles. The systematic search strategy was related to exposure to UPF and outcomes of NAFLD, MetS, and IR. The search keywords were defined through an exploratory investigation in addition to MeSH (Medical Subject Headings; PubMed/Cochrane) and similarly controlled vocabulary thesauruses (CINAHL Subject Headings, CINAHL; Emtree, Embase) to locate relevant articles ([Table S3](#)). We restricted the

results to the terms contained only in the title or title and abstract.

The non-systematic section of this review was related to exposure to UPF and outcomes of obesity and T2D. A thorough literature search was conducted in Google Scholar and PubMed and by checking the references of identified articles.

### Eligibility criteria

Different food classification systems have been proposed to categorize foods regarding food processing. A systematic review has shown that of the main five systems compared, NOVA is the most specific, coherent, clear, comprehensive, and workable.<sup>43</sup> Furthermore, as of today, the NOVA food classification is the most common system applied worldwide.<sup>27,28</sup> Thus, we included studies that used the NOVA food classification system and studies that did not use the NOVA food classification system but classified foods based on their processing level similarly to NOVA. Since UPF as a whole has been shown to be related to various NCDs,<sup>27</sup> we chose to include only studies that assessed UPF as a whole to elaborate on its association with NAFLD. In addition, studies focusing only on specific subgroups of processed foods (such as sugar-sweetened beverages or processed meat) were excluded since these subgroups have already been demonstrated to be related to NAFLD.<sup>24,44,45</sup> Additional inclusion criteria were: adult participants (aged >18 years); observational studies (cross-sectional and prospective); interventional studies; results reported as odds ratios (ORs), relative risks (RRs), hazard ratios (HRs), or  $\beta$ , with 95% CIs. In the systematic section, we assessed the association with NAFLD, MetS, and IR as diagnosed using any recognized diagnostic tools and criteria. Importantly, for NAFLD outcome, we excluded studies that included populations with viral hepatitis, autoimmune or inherited (Wilson disease and hemochromatosis) liver diseases, alcohol-related fatty liver disease, and fatty liver suspected to be secondary to hepatotoxic drugs or inflammatory bowel diseases. In addition, for MetS outcomes, we excluded studies focusing only on specific metabolic parameters, which are part of the MetS criteria (*e.g.*, fasting glucose and lipid profile). In the non-systematic section, we assessed the association with obesity and T2D, diagnosed according to standard criteria. In particular, for the obesity outcome, we included studies that estimated overweight, obesity, and abdominal obesity. No restrictions were applied on years, language, or quality of publication.

### Data extraction

Two independent reviewers (S.Z.S and L.G) assessed the eligibility of the selected papers based on previously defined inclusion and exclusion criteria. In case of disagreement, reviewers resolved it by consensus. The decision to include the studies was conducted in two stages; first, based on the study title and abstract screening, and next, by full-text reading. Finally, the following information was extracted from each selected study: author (year, location); source of data (setting, length); study population and participant demographics; exposure variables and details of the intervention; adjustment for potentially confounding variables; main outcome variables and results; information for the assessment of the risk of bias.

### Quality assessment

The quality of each included study identified through the systematic search was assessed by at least two independent reviewers (from the following: S.Z.S, L.G, S.E.A, D.I.W., and M.G.K)

by using the Joanna Briggs Institute's critical appraisal tools for observational studies<sup>46</sup> and the Cochrane Collaboration's tool<sup>47</sup> for risk of bias in randomized-controlled trials (RCTs) (RoB 2 tool). In case of disagreement, reviewers resolved it by consensus.

**Data synthesis**

In light of the variability in the assessment methods of UPF consumption and the studied clinical outcomes, and due to a relatively low number of studies for each of the outcomes, a narrative synthesis approach was chosen to report the results. We tabulated study characteristics and classified studies into groups according to the different outcomes and study designs. The findings were synthesized to provide extended insights regarding the associations of interest.

**Results**

**Study selection**

The selection process is shown in Fig. 1. A total of fifteen eligible studies were included, fourteen studies were included at the end of the selection process, and one additional study was identified through backward citation tracking (six studies with NAFLD outcome, eleven studies with MetS or IR outcomes [two studies

examined several outcomes]). Of the final eligible studies selected, one was an RCT, and fourteen were observational studies (nine cross-sectional and five prospective).

A list of full-text articles that did not meet the inclusion criteria, including the detailed reasons for their exclusion, is presented in the supplementary material (Table S4).

**Systematic evaluation of the association between UPF consumption and the risk of NAFLD**

A summary of all studies is depicted in Table 1. Despite the similarity in the method used to evaluate UPF consumption (based on the NOVA classification system), there was inconsistent evidence among the few observational studies examining the associations between UPF consumption as a whole and NAFLD. The study with the largest sample size is a recent prospective cohort of Chinese adults (n = 16,168),<sup>48</sup> with NAFLD evaluated by abdominal ultrasound (AUS), in which participants in the upper quartile of UPF consumption (calculated as nutrient density, g/1,000 kcal per day) had an 18% higher risk of developing NAFLD compared to those in the lower quartile. Furthermore, an increment of 62.7 g/1,000 kcal per day in UPF consumption (equal to one SD) was associated with a 6% increased risk of NAFLD in the fully adjusted model, taking into account BMI and principal risk factors contributing to NAFLD

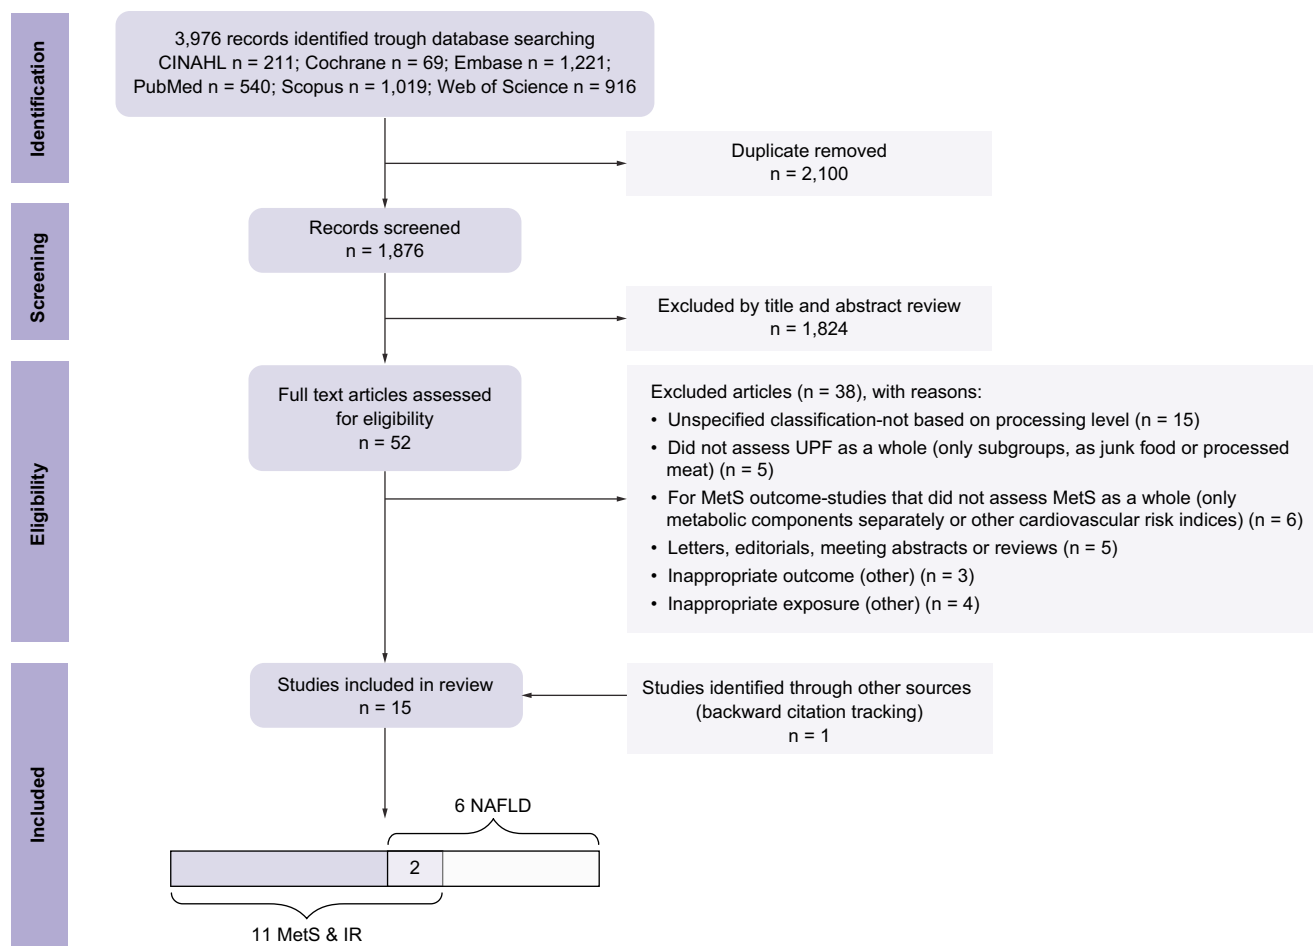

**Fig. 1. Flowchart of the study selection process for the present systematic review.** Fifteen studies were included at the end of the selection process, one RCT, and fourteen observational studies (nine cross-sectional and five prospective). IR, insulin resistance; MetS, metabolic syndrome; NAFLD, non-alcoholic fatty liver disease; RCT, randomized-controlled trial.

**Table 1. Ultra-processed food consumption and NAFLD (n = 6).**

| Author (year, location)                  | Source of data (mean/median follow-up time)                                                                                               | Population age-range and/or mean ± SD (%women)              | Dietary questionnaire UPF assessment method                                                                                                                                                          | Adjustment                                                                                                                                                                                                                                                | Main results                                                                                                                                                                                                                                                                                                                                          |
|------------------------------------------|-------------------------------------------------------------------------------------------------------------------------------------------|-------------------------------------------------------------|------------------------------------------------------------------------------------------------------------------------------------------------------------------------------------------------------|-----------------------------------------------------------------------------------------------------------------------------------------------------------------------------------------------------------------------------------------------------------|-------------------------------------------------------------------------------------------------------------------------------------------------------------------------------------------------------------------------------------------------------------------------------------------------------------------------------------------------------|
| <b>Intervention</b>                      |                                                                                                                                           |                                                             |                                                                                                                                                                                                      |                                                                                                                                                                                                                                                           |                                                                                                                                                                                                                                                                                                                                                       |
| Hall KD. (2020, USA) <sup>53</sup>       | Inpatient, crossover RCT                                                                                                                  | n = 20 31.2±1.6 y (50%)<br>n = 13 sub-sample with liver MRS | UPF diet vs. unprocessed diet for 2 weeks, followed by the alternate diet for the next 2 weeks. All meals provided at an amount of 1.6*EER, to consume ad libitum during 60 min. NOVA classification | Randomization                                                                                                                                                                                                                                             | Baseline liver fat (by MRS) was 1.2±0.1%. Liver fat was not significantly changed after the unprocessed diet (0.95±0.1%, p = 0.24) or the UPF diet (1.1±0.2%; p = 0.74)                                                                                                                                                                               |
| <b>Prospective</b>                       |                                                                                                                                           |                                                             |                                                                                                                                                                                                      |                                                                                                                                                                                                                                                           |                                                                                                                                                                                                                                                                                                                                                       |
| Zhang S. (2022, China) <sup>48</sup>     | The Tianjin Chronic Low-grade Systemic Inflammation and Health (TCLSIH) (4.2 y)                                                           | n = 16,168 18-90 y 38.3±0.2 y (57.4%)                       | Quantitative 81/100-items FFQ (in the past month, previously validated) NOVA classification (nutrient density, g/1,000 kCal per day)                                                                 | Age, gender, BMI, smoking status, alcohol consumption, educational level, occupation, household income, physical activity, family history of diseases, depressive symptoms, energy intake, healthy diet score, hypertension, diabetes, and hyperlipidemia | Participants with the highest UPF consumption (4 <sup>th</sup> quartile vs. 1 <sup>st</sup> quartile) had 18% relatively higher risk of developing NAFLD (by AUS) (HR 1.18, 95% CI 1.07-1.30; p for trend <0.0001). HR (95% CI) for one standard deviation increment in UPF consumption, equivalent to 62.7 g/1,000kCal per day, was 1.06 (1.03-1.09) |
| Konieczna J. (2022, Spain) <sup>49</sup> | Sub-sample from the Spanish Prevention with Mediterranean Diet (PREDIMED-Plus trial) Prospective analysis nested in RCT (1 y, first year) | n = 5,867 55-75 y 65.0±4.9 y (47.8%)                        | Semi-quantitative 143-items FFQ at baseline, 6- and 12-month follow-up NOVA classification (% of total food weight) (UPF coded as continuous and sex-specific quintiles)                             | Age, gender, study arm, educational level, smoking status, height, physical activity, sedentary behavior, alcohol consumption, and follow-up time. (also sensitivity analysis for dietary factors, obesity measures, and related diseases)                | A 10% increment in UPF consumption was associated with greater levels of NAFLD-related biomarkers; FLI score (β = 1.60, 95% CI 1.24-1.96) and HSI score (β = 0.43, 95% CI 0.29-0.57). FLI- estimates for Q5 vs. Q1; β = 3.73, 95% CI 3.10-4.35. HSI- estimates for Q5 vs. Q1; β = 0.93, 95% CI 0.67-1.18; p for trend <0.001)                         |
| <b>Cross-sectional</b>                   |                                                                                                                                           |                                                             |                                                                                                                                                                                                      |                                                                                                                                                                                                                                                           |                                                                                                                                                                                                                                                                                                                                                       |
| Liu Z. (2022, USA) <sup>50</sup>         | National Health and Nutrition Examination Survey (NHANES)                                                                                 | n = 6,545 >20 y mean 49.3 y (0.34ySE) (53.5%)               | 24-hour dietary recall NOVA classification (% of total food weight)                                                                                                                                  | Age, gender, race/ethnicity, educational level, family income to poverty ratio, marital status, smoking status, BMI, serum ALT, fasting triglycerides, total cholesterol, and uric acid                                                                   | Higher UPF consumption (4 <sup>th</sup> quartile of >68.3% vs. 1 <sup>st</sup> quartile of <41.6%) was associated with higher odds for probable NAFLD, as evaluated by FLI ≥30 (OR 1.83, 95% CI 1.33-2.53). A 10% increment in UPF consumption was associated with 15% higher odds for probable NAFLD (OR 1.15, 95% CI 1.09-1.22; p for trend <0.001) |
| Friden M. (2022, Sweden) <sup>52</sup>   | Prospective investigation of Obesity, Energy, and Metabolism (POEM)                                                                       | n = 286 50 y (all participants) (53%)                       | Semi-quantitative 140-items FFQ (a shorter version of a previously validated FFQ) NOVA classification (% of total kCal)                                                                              | Gender, BMI, educational level, physical activity, smoking status, alcohol consumption, and dietary factors (protein, fiber, total sugar, saturated and polyunsaturated fat intake)                                                                       | Intake of UPF was positively associated with liver fat (by MRI) in crude linear regression models (β = 0.02, p = 0.006). However, the association was attenuated after further adjustments. A 10% increment in UPF consumption was not associated with the prevalence of NAFLD (OR 1.32, 95% CI 0.84-2.09)                                            |

(continued on next page)

Table 1 (continued)

| Author (year, location)                            | Source of data (mean/median follow-up time) | Population age-range and/or mean ± SD (%women) | Dietary questionnaire UPF assessment method                              | Adjustment                                                                                                      | Main results                                                                                                                                                                                                                                                                                                                                                                                                                                                                                       |
|----------------------------------------------------|---------------------------------------------|------------------------------------------------|--------------------------------------------------------------------------|-----------------------------------------------------------------------------------------------------------------|----------------------------------------------------------------------------------------------------------------------------------------------------------------------------------------------------------------------------------------------------------------------------------------------------------------------------------------------------------------------------------------------------------------------------------------------------------------------------------------------------|
| Ivancovsky-Wajcman D. (2021, Israel) <sup>51</sup> | Hepatic screening study                     | n = 789<br>40-70 y 58.8±6.6 y (47.4%)          | Semi-quantitative 117-items FFQ<br>NOVA classification (% of total kCal) | Age, gender, BMI, saturated fat intake, protein intake, physical activity, coffee consumption, and fiber intake | UPF consumption (above median of 28% vs. under median) had no association with NAFLD (by AUS), NASH, and significant fibrosis biomarkers (FibroMax, BioPredictive).<br>Higher UPF consumption among subjects with NAFLD was associated with higher odds for NASH (OR 1.89, 95% CI 1.07-3.38). Higher UPF consumption among ever smokers in the entire sample and those with NAFLD was associated with significant fibrosis (OR 1.89, 95% CI 1.03-3.45 and OR 2.85, 95% CI 1.14-7.14, respectively) |

ALT, alanine aminotransferase; AUS, abdominal ultrasound; FFQ, food frequency questionnaire; FLI, fatty liver index; HSI, hepatitis steatosis index; MRS, magnetic resonance spectroscopy; NAFLD, non-alcoholic fatty liver disease; NASH, non-alcoholic steatohepatitis; OR, odds ratio; RCT, randomized-controlled trial; UPF, ultra-processed food; WC, waist circumference.

among other confounders. Moreover, supporting results were found in two other observational studies in which NAFLD was evaluated by biomarkers.<sup>49,50</sup> The first, a cross-sectional study among US adults (n = 6,545) with NAFLD evaluated by the fatty liver index.<sup>50</sup> The second, a prospective analysis nested in an RCT among Spanish adults (1 year of follow-up, n = 5,867), with NAFLD evaluated by the fatty liver index and hepatic steatosis index.<sup>49</sup>

In contrast, two smaller-scale cross-sectional studies<sup>51,52</sup> that examined the associations between UPF consumption and the prevalence of NAFLD found no significant independent associations. In the first study among Swedish adults (n = 286), which evaluated liver fat by magnetic resonance imaging (MRI), intake of UPF was positively associated with liver fat in crude linear regression models. However, the association was attenuated following adjustments.<sup>52</sup> In the second study held in Israel (n = 789),<sup>51</sup> no association was found with NAFLD (by AUS). Still, participants with NAFLD who consumed more than 28.4% of their daily energy from UPF (above sample median) had almost two-fold higher odds for NASH according to serum markers (NASHtest) (OR 1.89, 95% CI 1.07-3.38). Moreover, stratification by smoking status revealed a positive association between high UPF consumption and significant fibrosis marker (FibroTest) only among past or current smokers.

Only a small-sample sub-analysis (n = 13) within a crossover RCT examined the effect of 14-day UPF food intake on liver fat measured by magnetic resonance spectroscopy (MRS), showing no significant impact of unprocessed or UPF diet interventions.<sup>53</sup>

**Systematic evaluation of the association between UPF consumption and the risk of metabolic syndrome and insulin resistance**

A summary of all studies is depicted in Table 2. All studies that examined the association between UPF and MetS or IR used NOVA food classification and were observational. Most studies pointed towards a positive association. The two most recent and extensive prospective cohorts took place in Brazil and China (n = 8,065 and n = 5,147, respectively) and examined the association

between UPF intake and the risk for MetS.<sup>54,55</sup> Despite considerable differences in the study population as well as in the amount of UPF consumed (median UPF consumption – Brazil 366 g/day; China 16.3 g/day), higher UPF consumption was associated with increased risk for MetS in both cohorts (4<sup>th</sup> vs. 1<sup>st</sup> quartile; RR 1.19, 95% CI 1.07-1.32 and HR 1.17, 95% CI 1.01-1.35, in Brazil and China, respectively). In contrast, another study in the Brazilian population (n = 896),<sup>56</sup> with a prolonged follow-up time of 14 years, did not find an association. However, this study was conducted before the use of the NOVA food classification, and as emphasized by the authors, it was not initially designed to accurately measure UPF intake.

Positive associations were also observed in three cross-sectional studies,<sup>51,57,58</sup> including a large-scale examination survey conducted among 6,385 US adults,<sup>57</sup> in which higher UPF consumption (5<sup>th</sup> quintile of >71% vs. 1<sup>st</sup> quintile of <30%) was associated with a higher prevalence of MetS (prevalence ratio 1.28, 95% CI 1.09-1.50), and a dose-response association for every 10% increase in UPF consumption was observed.

On the other hand, two smaller-scale cross-sectional surveys found no significant association between UPF consumption and the prevalence of MetS.<sup>59,60</sup> Both studies have limitations. The first study was conducted among a very specific Quilombos community and solely among women (Brazil, n = 895).<sup>59</sup> The second study was conducted among a representative population but used NOVA food classification followed by dietary pattern analysis (Lebanon, n = 302),<sup>60</sup> in which the ‘ultra-processed’ dietary pattern also included non-UPF products such as roasted nuts and low-fat dairy, which may have led to an inadequate exposure assessment.

Only three cross-sectional studies examined the association between UPF and IR, using NOVA food classification and a variety of indices to estimate IR. The first, by Liu *et al.* (n = 6,545, US population),<sup>50</sup> found that higher UPF consumption (4<sup>th</sup> vs. 1<sup>st</sup> quartile) was associated with higher odds for IR (OR 1.52, 95% CI 1.12-2.07), as evaluated by HOMA-IR (homeostatic model assessment for IR). Furthermore, a 10% increment in UPF consumption was associated with 11% higher odds for IR. Conversely,

another study (Iran,  $n = 391$ , 100% women) did not demonstrate a significant association with HOMA nor with the QUICKI (quantitative insulin-sensitivity check index).<sup>61</sup> Similarly, no association was found in the third study conducted among 325 Brazilian adults, which evaluated IR using the triglyceride-glucose index.<sup>62</sup>

### The association between UPF consumption and primary risk factors for NAFLD

#### *Overweight, obesity, and abdominal obesity*

A summary of all studies is depicted in Table 3. The vast majority of the observational studies found a positive association between UPF consumption and several anthropometric measures: BMI, overweight, obesity, and abdominal obesity. All but one of the studies evaluated UPF consumption using the NOVA classification system. In an extensive prospective study based on the French NutriNet-Santé cohort ( $n = 110,260$ ),<sup>63</sup> UPF intake was positively associated with BMI gain and risk of overweight and obesity. In a recent cohort study of the UK Biobank ( $n = 18,218$ ), UPF consumption was related to a higher risk of multiple indicators of obesity.<sup>64</sup> A 79% and 30% higher risk of developing obesity and abdominal obesity was observed among those in the upper quartile compared to the lower quartile of UPF consumption. Similar results were observed in several other cohort studies.<sup>55,65–70</sup>

On the other hand, two cross-sectional studies found no significant associations between intake of UPF and measures of body weight. However, it should be noted that the first study (published in 2015,  $n = 2,174$ ) used a previous three-group NOVA classification that is no longer in use,<sup>71</sup> and the more recent study was a relatively small-scale study with a convenience sample of 200 adults.<sup>72</sup>

A few studies indicated gender differences. A cross-sectional national study of 15,977 US adults found a significant interaction between gender and UPF consumption for BMI and waist circumference, with a more pronounced association among women.<sup>73</sup> Two other cross-sectional studies (UK,  $n = 6,143$ ; Australia,  $n = 7,411$ ) found a stronger association between UPF and obesity measures among women,<sup>74,75</sup> and one additional Brazilian cohort ( $n = 896$ ) demonstrated an increased risk for abdominal obesity only among women (RR 0.57, 95% CI 0.43–0.77) with no association among men.<sup>56</sup>

A 2021 meta-analysis of observational studies (twelve cross-sectional and two prospective) supported the association between UPF consumption and increased risk of overweight (OR 1.36, 95% CI 1.23–1.51), obesity (OR 1.51, 95% CI 1.34–1.70), and abdominal obesity (OR 1.49, 95% CI 1.34–1.66).<sup>37</sup> Similar findings were found in three other meta-analyses conducted between 2020–2021,<sup>37–40</sup> with one reporting a linear dose-response association.<sup>40</sup>

Only a single crossover RCT examined the effect of UPF food intake on obesity,<sup>53</sup> in which twenty adults were given an *ad libitum* UPF diet vs. an unprocessed diet for 2 weeks each. During the UPF diet, the energy intake was greater by about 500 kCal/day, correlating to weight gain and resulting in about 1 kg weight gain vs. 1 kg weight reduction in those receiving the unprocessed diet.

### Type 2 diabetes

A summary of all studies is depicted in Table 4. All the studies that examined the association between UPF consumption and the risk of T2D found a strong and positive association using the NOVA food classification. All but one of the studies were

prospective cohorts, with the first published at the beginning of 2020 by Srour B. and colleagues (NutriNet-Santé, France).<sup>76</sup> In this study ( $n = 104,707$ , follow-up time of 6 years), a 10% increment in UPF consumption was associated with a higher risk of T2D (HR 1.13, 95% CI 1.03–1.23). This association was later confirmed by four other large prospective cohort studies conducted in different settings.<sup>41,77–79</sup> Notably, one of them is a recent study that demonstrated an association between UPF intake and T2D risk among three large US cohorts ( $n = 71,871$ ,  $n = 87,918$ , and  $n = 38,847$ ; follow-up of 5,187,678 person-years). This study also conducted a meta-analysis of five prospective cohort studies (including the present US cohort analysis), which further supported a positive association between UPF and T2D (pooled RR for each 10% increment of total UPF consumption was 1.12, 95% CI 1.10–1.13).<sup>41</sup>

### Quality assessment

The quality assessment of the included studies identified through the systematic search is depicted in Table S5. According to Joanna Briggs Institute's critical appraisal tools for observational studies, cohort studies were scored 9 to 11, and cross-sectional studies were scored 6 to 8. Three cohorts<sup>48,54,55</sup> and four cross-sectional<sup>50,51,57,58</sup> studies represented the highest quality (with a maximum of 11 and 8 points assigned to them, respectively). The most common risk of bias was regarding the reliability and validity of the methods used to evaluate the outcomes. The single crossover RCT included was evaluated separately using Cochrane's RoB 2 tool for RCTs. Accordingly, the study was evaluated as having 'some concern for bias', stemming from the limitation that NAFLD was tested only among a small sub-sample (see Table S6).

### Discussion

The present study systematically reviewed the association between UPF consumption and NAFLD and its leading risk factors; MetS and IR. Furthermore, it covered a broader perspective by comprehensively reviewing the association between UPF and other primary risk factors for NAFLD: obesity, and T2D.

While increased UPF consumption is strongly and consistently associated with obesity and T2D in the vast majority of the studies reviewed, pointing at a dose-response relationship, evidence concerning NAFLD, MetS, and IR outcomes is less robust. Specifically, the analysis carried out in this current systematic review found an increased risk of NAFLD in three studies out of six,<sup>48–50</sup> MetS in five out of eight,<sup>51,54,55,57,58</sup> and IR in one out of three.<sup>50</sup> Most studies that demonstrated an association with NAFLD were prospective, including a study in which NAFLD was evaluated by AUS, showing a significant association between high consumption of UPF and the incidence of NAFLD.<sup>48</sup> A substantial drawback is that half of the studies were cross-sectional and thus did not allow causal inference. In addition, the only interventional study had a very small sample size and was not explicitly designed to study NAFLD.<sup>53</sup> Furthermore, very few studies examined additional outcomes of NAFLD, such as NASH and fibrosis markers. Importantly, all studies adjusted for BMI and considered total daily energy intake (either by adjustment or as part of the UPF assessment method). Thus, in those demonstrating an association between UPF and NAFLD, the association seems independent of BMI, obesity, or energy intake.

Most studies that demonstrated an association with MetS were large-scale examination surveys, including two recent and

**Table 2. Ultra-processed food consumption and metabolic syndrome<sup>1</sup> and insulin resistance (n = 11).**

| Author (year, location)                          | Source of data (mean/median follow-up time)                                                 | Population age - range and/or mean ± SD (% women)        | Dietary questionnaire UPF assessment method                                                                                            | Adjustment                                                                                                                                                                                                                                   | Main results                                                                                                                                                                                                                                                                                                                                                                                   |
|--------------------------------------------------|---------------------------------------------------------------------------------------------|----------------------------------------------------------|----------------------------------------------------------------------------------------------------------------------------------------|----------------------------------------------------------------------------------------------------------------------------------------------------------------------------------------------------------------------------------------------|------------------------------------------------------------------------------------------------------------------------------------------------------------------------------------------------------------------------------------------------------------------------------------------------------------------------------------------------------------------------------------------------|
| <b>Prospective studies</b>                       |                                                                                             |                                                          |                                                                                                                                        |                                                                                                                                                                                                                                              |                                                                                                                                                                                                                                                                                                                                                                                                |
| Canhada SL. (2023, Brazil) <sup>54</sup>         | Brazilian Longitudinal Study of Adult health (ELSA-Brazil) (7.9 y)                          | n = 8,065<br>35-74 y<br>(58.7%)                          | Semi-quantitative 114-items FFQ<br>NOVA classification (g/day)                                                                         | Age, gender, BMI, center, race/color, income level, school achievement, smoking status, physical activity, alcohol consumption, energy intake                                                                                                | Higher UPF consumption (4 <sup>th</sup> quartile of >552 g/day vs. 1 <sup>st</sup> quartile of <234 g/day) was associated with 19% increased risk of incident MetS (RR 1.19, 95% CI 1.07–1.32). A 150 g increase in UPF consumption a day was associated with a 4% higher risk of incident MetS (RR = 1.04, 95% CI 1.02–1.06)                                                                  |
| Pan F. (2023, China) <sup>55</sup>               | China Nutrition and Health Survey (CNHS) (6 y)                                              | n = 5,147<br>>18 y<br>(50.0%)                            | 24-hour dietary recall of 3 consecutive days at each survey<br>Cumulative mean UPF intake<br>NOVA classification (g/day)               | Gender, age, BMI, educational level, place of residence, regions, income level, smoking status, drinking status, metabolic equivalents, urbanicity, energy intake, and dietary factors (protein, total fat, carbohydrate, and sodium intake) | Higher UPF consumption (4 <sup>th</sup> quartile of >36.1 g/day vs. 1 <sup>st</sup> quartile of <6.5 g/day) was associated with 17% increased risk for MetS (HR 1.17, 95% CI 1.01–1.35; p for trend = 0.047)                                                                                                                                                                                   |
| Magalhães EIDS. (2022, Brazil) <sup>56</sup>     | The Ribeirão Preto birth cohort (14 y)                                                      | n = 896<br>23-25 y (55.7%)                               | Semi-quantitative 83-item FFQ (non-validated)<br>NOVA classification (% of total kCal)<br>NOVA classification (% of total food weight) | Gender, age, skin color, educational level, marital status, household income, alcohol consumption, smoking status, physical activity, and energy intake                                                                                      | UPF consumption had no association with MetS (% of kCal RR 1.00, 95% CI 0.99-1.01; % of weight RR 1.00, 95% CI 0.99-1.01)                                                                                                                                                                                                                                                                      |
| <b>Cross-sectional studies</b>                   |                                                                                             |                                                          |                                                                                                                                        |                                                                                                                                                                                                                                              |                                                                                                                                                                                                                                                                                                                                                                                                |
| Bezerra Barbosa L. (2023, Brazil) <sup>59</sup>  | Quilombos community-based survey                                                            | n = 895<br>19-59 y<br>(100%)                             | 24-hour dietary recall<br>NOVA classification (% of total kCal)<br>NOVA score (ranging from 0 to 23)                                   | Model 3. Excess weight and neck circumference, plus variables from model 1 that showed p < 0.05 in the analysis for the aforementioned model - age and household income                                                                      | Higher UPF consumption (4 <sup>th</sup> quartile of 40.5% vs. 1 <sup>st</sup> quartile of 0.0%) was not associated with a higher prevalence of MetS (PR 1.09, 95% CI 0.89-1.32). None of NOVA score categories were associated with higher prevalence of MetS                                                                                                                                  |
| Liu Z. (2022, USA) <sup>50</sup>                 | National Health and Nutrition Examination Survey (NHANES)                                   | n = 6,545<br>>20 y<br>mean 49.3 y (0.34 y SE)<br>(53.5%) | 24-hour dietary recall<br>NOVA classification (% of total food weight)                                                                 | Age, gender, race/ethnicity, educational level, family income to poverty ratio, marital status, smoking status, BMI, serum ALT, fasting triglycerides, total cholesterol, and uric acid                                                      | Higher UPF consumption (4 <sup>th</sup> quartile of >68.3% vs. 1 <sup>st</sup> quartile of <41.6%) was associated with higher odds for IR (OR 1.52, 95% CI 1.12–2.07), and a 10% increment in UPF consumption was associated with 11% higher odds for IR (OR 1.11, 95% CI 1.05–1.18; p for trend <0.002). IR was defined as the upper quartile (>Q4) of the study sample's HOMA levels (>4.37) |
| Silva Meneguelli T. (2022, Brazil) <sup>62</sup> | The Cardiovascular Health Care Program of the University Federal of Vicosa (PRO-CARDIO-UFV) | n = 325<br>≥20 y<br>(58.5%)                              | 24-hour dietary recall<br>NOVA classification (% of total kCal)                                                                        | Gender, age, schooling, marital status, smoking status, and physical activity                                                                                                                                                                | No association was found between UPF and IR (PR 1.01, 95% CI 0.99-1.02). IR was defined as the upper quartile (>Q4) of the study sample's TyG index (exact threshold not specified)                                                                                                                                                                                                            |

(continued on next page)

**Table 2** (continued)

| Author (year, location)                            | Source of data (mean/median follow-up time)                                     | Population age - range and/or mean ± SD (% women) | Dietary questionnaire UPF assessment method                                                                                                                                                                                                               | Adjustment                                                                                                                                 | Main results                                                                                                                                                                                                                                                                                                                                                                                  |
|----------------------------------------------------|---------------------------------------------------------------------------------|---------------------------------------------------|-----------------------------------------------------------------------------------------------------------------------------------------------------------------------------------------------------------------------------------------------------------|--------------------------------------------------------------------------------------------------------------------------------------------|-----------------------------------------------------------------------------------------------------------------------------------------------------------------------------------------------------------------------------------------------------------------------------------------------------------------------------------------------------------------------------------------------|
| Hosseininasab D. (2022, Iran) <sup>61</sup>        | The community health center of the Tehran University of Medical Sciences (TUMS) | n = 391<br>18-48 y<br>36.7±9.1 y (100%)           | Semi-quantitative 147-items FFQ<br>NOVA classification (g/day)                                                                                                                                                                                            | Model 1. Age, BMI, physical activity, energy intake, supplement intake, job status                                                         | In adjusted linear regression models, an increase in one gram of UPF consumption was not significantly associated with QUICKI ( $\beta = -4.306$ , 95% CI -0.001-0.001) nor HOMA ( $\beta = -2.096$ , 95% CI -0.002-0.002) in the main multivariable model                                                                                                                                    |
| Ivancovsky-Wajcman D. (2021, Israel) <sup>51</sup> | Hepatic screening study                                                         | n = 789<br>40-70 y 58.8±6.6 y (47.4%)             | Semi-quantitative 117-items FFQ<br>NOVA classification (% of total kCal)                                                                                                                                                                                  | Age, gender, BMI, saturated fat intake, protein intake, physical activity, coffee consumption, and fiber intake                            | Higher UPF consumption (above median of 28%) was associated with higher odds for MetS (OR 1.88, 95% CI 1.31-2.71)                                                                                                                                                                                                                                                                             |
| Martínez Steele E. (2019, USA) <sup>57</sup>       | National Health and Nutrition Examination Survey (NHANES)                       | n = 6,385<br>>20 y (50.8%)                        | 24-hour dietary recall<br>NOVA classification (% of total kCal)                                                                                                                                                                                           | Gender, age, race/ethnicity, family income to poverty ratio, educational attainment, smoking status, and physical activity                 | A 10% increase in UPF consumption was associated with a 4% higher prevalence of MetS (PR 1.04, 95% CI 1.02-1.07). Higher UPF consumption (5 <sup>th</sup> quintile of >71% vs. 1 <sup>st</sup> quintile of <40%) was associated with a higher prevalence of MetS (PR 1.28, 95% CI 1.09-1.50). The association was stronger in young adults (PR 1.94, 95% CI 1.39-2.72) and decreased with age |
| Lavigne-Robichaud M. (2018, Canada) <sup>58</sup>  | Nituuchischaayihitaa Aschii Environment-and-Health Study                        | n = 811<br>≥18 y (58.7%)                          | 24-hour dietary recall<br>NOVA classification (% of total kCal)                                                                                                                                                                                           | Age, gender, area of residence, smoking status, alcohol consumption, and energy intake                                                     | Higher UPF consumption (5 <sup>th</sup> quintile of 83% vs. 1 <sup>st</sup> quintile of 21%) was associated with higher prevalence of MetS (OR 1.90, 95% CI 1.14-3.17; <i>p</i> for trend = 0.04)                                                                                                                                                                                             |
| Nasreddine L. (2018, Lebanon) <sup>60</sup>        | Community-based survey                                                          | n = 302<br>≥18 y 39.4±13.8 y (61.2%)              | Semi-quantitative 80-items FFQ<br>NOVA classification (% of total kCal) followed by dietary pattern analysis. The ultra-processed dietary pattern consisted mainly of fast foods, snacks, and sweets, while also including meat, roasted nuts, and liquor | Age, gender, BMI, marital status, area of residence, educational level, income level, smoking status, physical activity, and energy intake | The ultra-processed dietary pattern had no association with MetS (OR 1.11, 95% CI 0.26-4.65)                                                                                                                                                                                                                                                                                                  |

AHA, American Heart Association; ALT, alanine aminotransferase; FFQ, food frequency questionnaire; HOMA-IR, homeostatic model assessment for insulin resistance; HR, hazard ratio; IR, insulin resistance; MetS, metabolic syndrome; OR, odds ratio; PR, prevalence ratio; QUICKI, quantitative insulin-sensitivity check index; RR, relative risk; TyG, triglyceride-glucose (index); UPF, ultra-processed food.

<sup>1</sup> MetS definition as accepted, recommended by several statements and guidelines of medical associations<sup>109,110</sup> and with modification for use in the Asian population:<sup>111</sup> the presence of at least three of five criteria; impaired fasting glucose (fasting glucose ≥100 mg/dl and/or medication), hypertension (systolic blood pressure/diastolic blood pressure ≥130/80-85 mmHg and/or medication), hypertriglyceridemia (triglycerides ≥150 mg/dl and/or medications), low levels of high-density lipoprotein cholesterol <40/50 mg/dl (among men and women, respectively), and abdominal obesity (elevated waist circumference among men and women, population- and country-specific definitions).



**Table 3. Ultra-processed food consumption and overweight, obesity, and abdominal obesity (n = 21).**

| Author (year, location)                               | Source of data (mean/median follow-up time)                                                                                                  | Population age - range and/or mean ± SD (% women) | Dietary questionnaire UPF assessment method                                                                                                                                                                                             | Main results                                                                                                                                                                                                                                                                                                                                                                                                                                                                                                                                                     |
|-------------------------------------------------------|----------------------------------------------------------------------------------------------------------------------------------------------|---------------------------------------------------|-----------------------------------------------------------------------------------------------------------------------------------------------------------------------------------------------------------------------------------------|------------------------------------------------------------------------------------------------------------------------------------------------------------------------------------------------------------------------------------------------------------------------------------------------------------------------------------------------------------------------------------------------------------------------------------------------------------------------------------------------------------------------------------------------------------------|
| <b>Intervention</b>                                   |                                                                                                                                              |                                                   |                                                                                                                                                                                                                                         |                                                                                                                                                                                                                                                                                                                                                                                                                                                                                                                                                                  |
| Hall KD. (2020, USA) <sup>53</sup>                    | Inpatient, crossover RCT                                                                                                                     | n = 20<br>31.2±1.6 y<br>(50%)                     | UPF diet vs. unprocessed diet for 2 weeks, followed by the alternate diet for the next 2 weeks. All meals were provided at an amount of 1.6*EER, to consume ad libitum during 60 min. NOVA classification                               | Energy intake was greater during the UPF diet (508±106 kCal/day; p = 0.0001), with increased consumption of carbohydrate (280±54 kCal/day; p <0.0001) and fat (230±53 kCal/day; p = 0.0004). Participants gained 0.8±0.3 kg (p = 0.01) during the UPF diet and lost 1.1±0.3 kg (p = 0.001) during the unprocessed diet                                                                                                                                                                                                                                           |
| <b>Prospective studies</b>                            |                                                                                                                                              |                                                   |                                                                                                                                                                                                                                         |                                                                                                                                                                                                                                                                                                                                                                                                                                                                                                                                                                  |
| Pan F. (2023, China) <sup>55</sup>                    | China Nutrition and Health Survey (CNHS) (6 y)                                                                                               | n = 5,147<br>>18 y<br>(50.0%)                     | 24-hour dietary recall of 3 consecutive days at each survey<br>Cumulative mean UPF intake<br>NOVA classification (g/day)                                                                                                                | Higher UPF consumption (4 <sup>th</sup> quartile of >36.1 g/day vs. 1 <sup>st</sup> quartile of <6.5 g/day) was associated with 33% increased risk of abdominal obesity (WC ≥90 for men and ≥80 for women) (HR = 1.33, 95% CI 1.18–1.51; p for trend <0.001)                                                                                                                                                                                                                                                                                                     |
| Magalhães EIDS. (2022, Brazil) <sup>56</sup>          | The Ribeirão Preto birth cohort (14 y)                                                                                                       | n = 896<br>23-25 y<br>(55.7%)                     | Semi-quantitative 83-items FFQ (non-validated)<br>NOVA classification (% of total kCal)<br>NOVA classification (% of total food weight)                                                                                                 | Only in women, UPF consumption was associated with increased risk of abdominal obesity (% of kCal RR = 0.57, 95% CI 0.38-0.85; % of weight RR = 0.57, 95% CI 0.43-0.77)                                                                                                                                                                                                                                                                                                                                                                                          |
| Li M. (2021, China) <sup>68</sup>                     | China Nutrition and Health Survey (CNHS) (NA)                                                                                                | n = 12,451<br>>20 y<br>43.7±14.7 y<br>(51.3%)     | 24-hour dietary recall of 3 consecutive days at each survey<br>Cumulative mean UPF intake<br>NOVA classification (g/day)<br>categorized into four levels: non-consumers, 1–19 g/day, 20–49 g/day, ≥50 g/day                             | Higher UPF consumption (levels: 1-19 g/day, 20-49 g/day, ≥50 g/day vs. non-consumers) was associated with increased risk of overweight/obesity (BMI ≥25 kg/m <sup>2</sup> ) (OR (95% CI) 1.45 (1.26-1.65), 1.34 (1.15-1.57), and 1.45 (1.21-1.74), respectively, p for trend = 0.015), and of central obesity (OR (95% CI) 1.54 (1.38-1.72), 1.35 (1.19-1.54), and 1.50 (1.29-1.74), respectively)                                                                                                                                                               |
| Cordova R. (2021, 9 European countries) <sup>69</sup> | European Prospective Investigation into Cancer and Nutrition (EPIC) study (5 y)                                                              | n = 348,748<br>25-70 y<br>(73%)                   | Quantitative dietary questionnaires or semi-quantitative FFQ, or a combination of semi-quantitative FFQ and 7- and 14-day records. NOVA classification (quintiles of energy-adjusted UPF consumption, g/day, using the residual method) | Energy-adjusted UPF consumption quintiles (176±102, 221±117, 270±129, 364±133, 686±303 g/day).<br>Higher consumption of UPF (per 1 SD increment) was positively associated with weight gain (0.12 kg/5 years, 95% CI 0.09-0.15). Higher UPF consumption (5 <sup>th</sup> quintile vs. 1 <sup>st</sup> quintile) was associated with greater risk of becoming overweight/obese in normal weight participants (RR = 1.15, 95% CI 1.11-1.19), and with greater risk (RR = 1.16, 95% CI 1.09-1.23) of becoming obese in participants who were overweight at baseline |
| Konieczna J. (2021, Spain) (67)                       | Sub-sample from the Spanish Prevention with Mediterranean Diet (PREDIMED-Plus trial)<br>Prospective analysis nested in RCT (1 y, first year) | n = 1,485<br>55-75 y<br>65.3±5 y<br>(47.5%)       | Semi-quantitative 143-items FFQ at baseline, 6- and 12-month follow-up (face-to-face)<br>NOVA classification (% of total food weight)                                                                                                   | A 10% increment in UPF consumption was associated with greater accumulation of visceral fat measured with DXA (β 0.09 z-score, 95% CI 0.05-0.13), android-to-gynoid fat ratio (0.05, 0.00-0.09, and total fat (0.09, 0.06-0.13). Comparison of the highest UPF consumption (3 <sup>rd</sup> tertile vs. 1 <sup>st</sup> tertile) related to increased regional and overall adiposity during follow-up, with a significant dose-response relationship (p for trend <0.05)                                                                                         |

(continued on next page)

**Table 3** (continued)

| Author (year, location)                          | Source of data (mean/median follow-up time)                                                 | Population age - range and/or mean ± SD (% women) | Dietary questionnaire<br>UPF assessment method                                                                                                                                                      | Main results                                                                                                                                                                                                                                                                                                                                                                                         |
|--------------------------------------------------|---------------------------------------------------------------------------------------------|---------------------------------------------------|-----------------------------------------------------------------------------------------------------------------------------------------------------------------------------------------------------|------------------------------------------------------------------------------------------------------------------------------------------------------------------------------------------------------------------------------------------------------------------------------------------------------------------------------------------------------------------------------------------------------|
| Rauber F. (2021, UK) <sup>64</sup>               | Sub-sample of the UK Biobank cohort (5 y)                                                   | n = 18,218<br>40-69 y 55.9±7.4 y (52.1%)          | 24-hour dietary recall (web-based, self-administered)<br>NOVA classification (% of total kCal)<br>(Quartiles of UPF, sex-specific cut-offs)                                                         | Higher UPF consumption (4 <sup>th</sup> quartile; men 71.7% and women 70.3% vs. 1 <sup>st</sup> quartile; men 26.3% and women 24.1%) was associated with higher risk for obesity (HR = 1.79, 95%CI 1.06-3.03), abdominal obesity (HR = 1.30, 95%CI 1.13-1.48), ≥5% increase in BMI (HR = 1.31, 95% CI 1.20-1.43), WC (HR = 1.35, 95%CI 1.25-1.45) and %BF (HR = 1.14, 95% CI 1.03-1.25)              |
| Sandoval-Insauti H. (2020, Spain) <sup>70</sup>  | Seniors-ENRICA-1 cohort (6 y)                                                               | n = 652<br>≥60 y<br>67.1±5.8 y (44.3%)            | Face-to-face dietary history (DH-ENRICA), recording all food consumed in a typical week in the preceding year.<br>NOVA classification (% of total kCal)<br>(tertiles of UPF, sex-specific cut-offs) | Participants with a higher UPF consumption (3 <sup>rd</sup> tertile of 28.7% vs. 1 <sup>st</sup> tertile of 7.3%) were more likely to develop abdominal obesity (OR = 1.62, 95%CI 1.04–2.54; p for linear trend = 0.037).<br>The food groups that contributed the most to this association were non-alcoholic beverages and meat products                                                            |
| Beslay M. (2020, France) <sup>63</sup>           | NutriNet-Santé cohort (4.1 y)                                                               | n = 110,260<br>≥18 y<br>43.1±14.6 y (78.2%)       | 24-hour dietary recall (web-based) of 3 non-consecutive days, randomly assigned over two weeks<br>NOVA classification (% of total food weight)                                                      | A positive association between an increment of 10% of UPFs and gain in BMI ( $\beta$ time × UPF continuous = 0.02 (0.01–0.02), p <0.001). UPF intake was associated with a higher risk of overweight (HR for an absolute increase of 10% of UPF = 1.11, 95% CI 1.08-1.14, p<0.001), and for obesity (HR for an absolute increment of 10% of UPF = 1.09, 95% CI 1.05-1.13, p<0.001)                   |
| Canhada SL. (2020, Brazil) <sup>66</sup>         | Brazilian Longitudinal Study of Adult health (ELSA-Brazil) (3.8 y)                          | n = 11,827<br>35-74 y<br>51.3±8.7 y (55%)         | Semi-quantitative 114-items FFQ<br>NOVA classification (% of total kCal)                                                                                                                            | Highest quartile (>30.8%) vs. the lowest quartile (<17.8%) of UPF consumption was associated with a greater risk of large weight gain and waist gain, defined as annual gain ≥90 <sup>th</sup> percentile (RR = 1.27, 95% CI 1.07-1.50 and RR = 1.33, 95% CI 1.12-1.58 respectively), overweight/obesity incidence (RR = 1.20, 95% CI 1.03-1.40) and obesity incidence (RR = 1.02, 95% CI 0.85-1.21) |
| Mendonça RD. (2016, Spain) <sup>65</sup>         | The Seguimiento University of Navarra (SUN-project) (8.9 y)                                 | n = 8,451<br>37.6±11.0 y (65%)                    | Self-administered semi-quantitative 136-items FFQ<br>NOVA classification (servings/day)                                                                                                             | Participants in the highest quartile vs. the lowest (6.1 vs. 1.5 servings/day of UPF) had a higher risk of developing overweight or obesity (HR = 1.26, 95% CI 1.10-1.45; p for trend = 0.001).<br>A higher incidence of overweight and obesity with increasing baseline quartiles of UPF                                                                                                            |
| <b>Cross-sectional</b>                           |                                                                                             |                                                   |                                                                                                                                                                                                     |                                                                                                                                                                                                                                                                                                                                                                                                      |
| Silva Meneguelli T. (2022, Brazil) <sup>62</sup> | The cardiovascular health care program of the Federal University of Vicosa (PRO-CARDIO-UFV) | n = 325<br>≥20 y (58.5%)                          | 24-hour dietary recall<br>NOVA classification (% of total kCal)                                                                                                                                     | Positive associations were found between UPF consumption and excessive body weight (adults with BMI ≥25 kg/m <sup>2</sup> and elderlies with BMI ≥ 28kg/m <sup>2</sup> ) (PR = 1.004, 95% CI 1.00-1.01), and abdominal obesity (WC ≥90 for men and ≥80 for women) (PR = 1.004, 95% CI 1.00-1.01). UPF consumption was not associated with percent body fat                                           |
| Martinez-Perez C. (2021, Spain) <sup>105</sup>   | The PREDIMED-Plus trial                                                                     | n = 5,636 65.1±4.9 y (48.5%)                      | Semi-quantitative 143-items FFQ<br>NOVA, IARC, IFIC, and UNC classification (g/day)                                                                                                                 | UPF consumption in all the classification systems was associated with weight and WC, NOVA classification showed the highest value. A 5% increment in UPF consumption was associated with 0.11 higher BMI (95% CI 0.05-0.18)                                                                                                                                                                          |

(continued on next page)

Table 3 (continued)

| Author (year, location)                     | Source of data (mean/median follow-up time)                        | Population age - range and/or mean ± SD (% women) | Dietary questionnaire UPF assessment method                              | Main results                                                                                                                                                                                                                                                                                                                                                                                                                                                                                                                                                                                                                                                |
|---------------------------------------------|--------------------------------------------------------------------|---------------------------------------------------|--------------------------------------------------------------------------|-------------------------------------------------------------------------------------------------------------------------------------------------------------------------------------------------------------------------------------------------------------------------------------------------------------------------------------------------------------------------------------------------------------------------------------------------------------------------------------------------------------------------------------------------------------------------------------------------------------------------------------------------------------|
| Machado PP. (2020, Australia) <sup>75</sup> | The National Nutrition and Physical Activity Survey (NNPAS)        | n = 7,411<br>20-85 y<br>(48.3%)                   | 24-hour dietary recall<br>NOVA classification (% of total kCal)          | UPF consumption was associated with higher BMI and WC and a greater prevalence of obesity and abdominal obesity ( <i>p</i> trend ≤ 0.001 for all outcomes). Dose-response associations between UPF consumption and BMI/obesity. Higher UPF consumption (5 <sup>th</sup> quintile of 74.2% vs. 1 <sup>st</sup> quintile of 12.7%) was associated with higher odds of obesity (OR 1.61, 95% CI 1.27-2.04) and abdominal obesity (OR 1.38, 95% CI 1.10-1.72). The association between UPF consumption and BMI/WC was stronger among people aged ≥40 years, females, and inactive people                                                                        |
| Nardocci M. (2021, Canada) <sup>106</sup>   | Canadian Community Health Survey (CCHS)-nutrition                  | n = 13,608<br>>19 y<br>(50%)                      | 24-hour dietary recall<br>NOVA classification (% of total kCal)          | A 10% increase in UPF consumption was associated with 6% higher odds of obesity (OR 1.06, 95% CI 1.02-1.11). Higher UPF consumption (3 <sup>rd</sup> tertile of ≥58.7% kCal/day vs. 1 <sup>st</sup> of ≤ 38.5% kCal/day) was associated with higher odds of obesity (OR 1.31, 95% CI 1.06-1.60). Stratification by education revealed an association among high-education university participants (OR 2.17, 95% CI 1.45-3.24); with no association for adults who graduated high school or less                                                                                                                                                             |
| Rauber F. (2020, UK) <sup>74</sup>          | The UK National Diet and Nutrition Survey Rolling Programme (NDNS) | n = 6,143<br>19-96 y<br>(51.6%)                   | Food diary - 4 days<br>NOVA classification (% of total kCal)             | Higher UPF consumption (4 <sup>th</sup> quartile of 74% vs. 1 <sup>st</sup> quintile of 35%) was associated with 1.66 kg/m <sup>2</sup> higher BMI (95% CI 0.96-2.36), 3.56 cm higher WC (95% CI 1.79-5.33) and higher odds for being obese (OR 1.90, 95% CI 1.39-2.61). The association was stronger among women. A dose-response relationship was observed in both sexes. A 10% increase in UPF consumption was associated with 0.38 kg/m <sup>2</sup> higher BMI (95% CI 0.20-0.55), 0.87 cm higher WC (95% CI 0.40-1.33), and higher odds of being obese (OR 1.18, 95% CI 1.08-1.28). No association was observed for abdominal obesity (in both sexes) |
| Asma' A. (2019, Malaysia) <sup>72</sup>     | Kuala Nerus, a district in Terengganu                              | n = 200<br>18-59 y<br>median 33 y<br>(75%)        | 24-hour dietary recall - 2 days<br>NOVA classification (% of total kCal) | UPF consumption was not associated with BMI, WC, and %body fat                                                                                                                                                                                                                                                                                                                                                                                                                                                                                                                                                                                              |
| Nardocci M. (2019, Canada) <sup>107</sup>   | Canadian Community Health Survey (CCHS)                            | n = 19,363<br>≥18 y<br>46±0.13 y<br>(49%)         | 24-hour dietary recall<br>NOVA classification (% of total kCal)          | UPF consumption was associated with BMI (the mean BMI across quintiles of UPF consumption was 26.6; 27.0; 26.8; 27.3; 27.4 kg/m <sup>2</sup> ; <i>p</i> for trend < 0.001). A 10% point increase in UPF consumption was associated with higher prevalence of obesity (OR 1.05, 95% CI 1.01- = 1.08) and overweight (OR 1.03, 95% CI 1.01-1.07). Higher UPF consumption (5 <sup>th</sup> quintile of 76.0% vs. 1 <sup>st</sup> quintile of 20.1%) was associated with higher odds of obesity (OR 1.32, 95% CI 1.05-1.57)                                                                                                                                     |

(continued on next page)

Table 3 (continued)

| Author (year, location)                 | Source of data (mean/median follow-up time)                | Population age - range and/or mean ± SD (% women) | Dietary questionnaire UPF assessment method                                                                                 | Main results                                                                                                                                                                                                                                                                                                                                                                                                                                      |
|-----------------------------------------|------------------------------------------------------------|---------------------------------------------------|-----------------------------------------------------------------------------------------------------------------------------|---------------------------------------------------------------------------------------------------------------------------------------------------------------------------------------------------------------------------------------------------------------------------------------------------------------------------------------------------------------------------------------------------------------------------------------------------|
| Juul F. (2018, USA) <sup>73</sup>       | National Health and Nutrition Examination Survey (NHANES)  | n = 15,977<br>20-64 y 41.9±0.2 y (50.6%)          | 24-hour dietary recall<br>NOVA classification (% of total kCal)                                                             | Higher UPF consumption (5 <sup>th</sup> quintile of >74.2% vs. 1 <sup>st</sup> quintile of <36.5%) was associated with 1.61 units higher BMI (95% CI 1.11-2.10), 4.07 cm higher WC (95% CI 2.94-5.19) and higher odds for being overweight (OR 1.48, 95% CI 1.25-1.76), obese (OR 1.53, 95% CI 1.29-1.81) and abdominal obesity (OR 1.62, 95% CI 1.39-1.89); <i>p</i> for trend <0.001 for all outcomes. The association was stronger among women |
| Silva FM. (2018, Brazil) <sup>108</sup> | Brazilian Longitudinal Study of Adult health (ELSA-Brazil) | n = 8,977<br>35-64 y (51.9%)                      | Semi-quantitative 114-items FFO<br>NOVA classification (% of total kCal)                                                    | Higher UPF consumption (4 <sup>th</sup> quartile >29% vs. 1 <sup>st</sup> quartile <16%) was associated with a higher BMI ( $\beta$ = 0.80, 95% CI 0.53-1.07 kg/m <sup>2</sup> ), WC ( $\beta$ = 1.71, 95% CI 1.02-2.40 cm) and higher odds for being overweight (OR 1.31, 95% CI 1.13-1.51), obese (OR 1.41, 95% CI 1.18-1.69) and increased WC (OR 1.41, 95% CI 1.20-1.66)                                                                      |
| Adams J. (2015, UK) <sup>71</sup>       | UK National Diet and Nutrition Survey (NDNS)               | n = 2,174<br>>18 y (51.4%)                        | Food diary - 4 days<br>Classification: unprocessed or minimally processed; processed ingredients; and UPF (% of total kCal) | UPF consumption had no association with markers of body weight. Higher intake of processed ingredients was associated with lower BMI [-0.09, 95% CI -0.16(-0.03)], and reduced odds of overweight/obesity (OR 0.97, 95% CI 0.96-0.99), and obesity (OR 0.98, 95% CI 0.97-0.99)                                                                                                                                                                    |

DXA, dual-energy X-ray absorptiometry; EER, estimated energy requirements; FFO, food frequency questionnaire; HR, hazard ratio; IARC, International Agency for Research on Cancer; IFC, International Food Information Council; OR, odds ratio; PR, prevalence ratio; RCT, randomized-controlled trial; RR, relative risk; UNC, University of North Carolina; UPF, ultra-processed food; WC, waist circumference.

extensive prospective cohorts.<sup>54,55</sup> At the same time, most studies that did not find an association were cross-sectional and had a significantly smaller sample size.<sup>59,60</sup> There are no interventional studies in this field. In addition, there were differences in the extent of adjustment between the studies, with some of them<sup>56-60</sup> not adjusting for known risk factors for MetS,<sup>80</sup> such as BMI, physical activity, and alcohol consumption. Lastly, there is little data regarding the association between UPF and IR. All three studies were cross-sectional, and two of them did not focus on IR as the primary outcome.<sup>51,62</sup>

The harmful effects of UPF on NAFLD can be explained through several pathways (Fig. 2). First, the harmful effect may be partly explained by the poor nutritional value of UPF.<sup>27</sup> The majority of UPF has a high caloric density and large amounts of added sugar and SFAs, which are well-known risk factors for NAFLD. Moreover, a high UPF diet may indicate decreased consumption of foods with high nutritional quality, known as protective factors for NAFLD, such as fruits and vegetables that contribute vitamins and fibers (among other nutrients). However, most studies adjusted for nutritional factors other than UPF, such as SFA intake, fiber intake, and overall adherence to a healthy diet, but the association between UPF and NAFLD persisted.<sup>48,49</sup>

Second, non-nutritional food compounds or additives within UPF may contribute to NAFLD, possibly through their pro-oxidative and proinflammatory properties such as endocrine-disrupting chemicals (EDCs)<sup>81,82</sup> and advanced glycation end products (AGEs).<sup>83,84</sup> EDCs are a large group of diverse chemical compounds that can be classified as natural or synthetic. Exposure to the latter is increasing due to the development of industrialized areas, with pesticides, phthalates, and bisphenol A (BPA) being some of the most characterized EDCs to date.<sup>81</sup> BPA exposure is very common and has been studied in relation to NAFLD. It is a building block of plastics and of the lining in food and beverage containers and disrupts pancreatic B-cells function and whole-body glucose homeostasis.<sup>85</sup> A recent study examining the association of BPA with histological diagnosis of NAFLD found significantly higher BPA plasma levels among 60 individuals with NAFLD compared to matched controls, with even higher BPA plasma levels among individuals with NASH.<sup>85</sup> While some studies demonstrated a link between UPF consumption and increased exposure to various EDCs,<sup>86,87</sup> further studies are needed to confirm an association with NAFLD.

In addition, UPF can significantly contribute to the intake of AGEs due to its high sugar, fructose, and fat content and high heat preparation methods during industrial processing.<sup>88</sup> A diet high in AGEs results in increased serum concentrations of AGEs,<sup>89</sup> and in turn, serum AGEs play a role in NAFLD pathogenesis. The activation of liver RAGE (AGE receptor) by AGEs leads to a cascade of downstream signaling, including oxidative stress and hepatocyte ballooning.<sup>88,89</sup> A case-control study among 675 individuals in Iran found that a diet high in AGEs was associated with higher odds of NAFLD.<sup>84</sup> Furthermore, a meta-analysis of observational studies, including 1,844 participants, found an association between different types of serum AGEs and NAFLD.<sup>83</sup> Regarding T2D and MetS, a meta-analysis of thirteen RCTs showed that a diet low in AGEs reduced serum insulin, total cholesterol, and LDL levels.<sup>90</sup> Another meta-analysis of seventeen RCTs further found that a diet low in AGEs reduced serum leptin and

**Table 4. Ultra-processed food consumption and type-2 diabetes (n = 6).**

| Author (year, location)                        | Source of data (mean/median follow-up time)                                                          | Population age – range and/or mean ± SD (% women)                                                                     | Dietary questionnaire UPF assessment method                                                                                                                                                       | Main results                                                                                                                                                                                                                                                                                                                                                                                                                                                                                                                                                                                                  |
|------------------------------------------------|------------------------------------------------------------------------------------------------------|-----------------------------------------------------------------------------------------------------------------------|---------------------------------------------------------------------------------------------------------------------------------------------------------------------------------------------------|---------------------------------------------------------------------------------------------------------------------------------------------------------------------------------------------------------------------------------------------------------------------------------------------------------------------------------------------------------------------------------------------------------------------------------------------------------------------------------------------------------------------------------------------------------------------------------------------------------------|
| <b>Prospective studies</b>                     |                                                                                                      |                                                                                                                       |                                                                                                                                                                                                   |                                                                                                                                                                                                                                                                                                                                                                                                                                                                                                                                                                                                               |
| Chen Z. (2023, USA) <sup>41</sup>              | The Nurses' Health Study (NHS), The NHSII, and The Health Professionals' Follow-up Study (HPFS) (NA) | NHS, n = 71,871<br>30-55 y<br>(100%)<br>NHSII, n = 87,918<br>25-42 y<br>(100%)<br>HPFS, n = 38,847<br>40-75 y<br>(0%) | Semi-quantitative 116-130-items FFQ<br>NOVA classification (servings/day)<br>(sensitivity analysis for total kCal/day, % of total kCal, % of total food weight, and energy-adjusted servings/day) | Higher UPF consumption (5 <sup>th</sup> quintile vs. 1 <sup>st</sup> quintile), as servings/day, was associated with higher risk of T2D (pooled HR 1.28, 95% CI 1.21-1.36). Each one-serving increment in UPF consumption was associated with higher risk for T2D (pooled HR 1.03, 95% CI 1.02-1.03).<br>Higher UPF consumption (5 <sup>th</sup> quintile vs. 1 <sup>st</sup> quintile), as % of total food weight, was associated with higher risk of T2D (pooled HR 1.46, 95% CI 1.391.54). A 10% increment in UPF consumption was associated with a higher risk for T2D (pooled HR 1.12, 95% CI 1.10-1.13) |
| Duan MJ. (2022, The Netherlands) <sup>77</sup> | The Lifelines cohort study (41 months)                                                               | n = 70,421<br>35-70 y<br>(58.6%)                                                                                      | Semi-quantitative 110-items FFQ<br>NOVA classification (% of total food weight) and dietary pattern                                                                                               | A 10% increment in UPF consumption was associated with a higher risk for T2D (OR 1.25, 95% CI 1.16-1.34). Higher risk also for a pattern high in cold savory snacks (OR 1.16, 95% CI 1.09-1.22) and a pattern high in warm savory snacks (OR 1.15, 95% CI 1.08-1.21)                                                                                                                                                                                                                                                                                                                                          |
| Levy RB. (2021, UK) <sup>79</sup>              | UK Biobank (5.4 y)                                                                                   | n = 21,730<br>40-69 y<br>55.8+7.4 y<br>(52.9%)                                                                        | 24-hour dietary recall<br>NOVA classification (% of total food weight)                                                                                                                            | A 10% points increment in UPF consumption was associated with a higher risk for T2D (HR 1.12, 95% CI 1.04-1.20). Higher UPF consumption (4 <sup>th</sup> quartile of 49.1% vs. 1 <sup>st</sup> quintile of 7.7%) was associated with higher risk of T2D (HR 1.44, 95% CI 1.04-2.02; p for trend <0.028)                                                                                                                                                                                                                                                                                                       |
| Llaverro-Valero M. (2021, Spain) <sup>78</sup> | The Seguimiento University of Navarra (SUN-project) (12 y)                                           | n = 20,060<br>37.4±12.2 y<br>(61.5%)                                                                                  | Semi-quantitative 136-items FFQ<br>NOVA classification (g/day)                                                                                                                                    | Higher UPF consumption (3 <sup>rd</sup> tertile >323.3 g/day vs. 1 <sup>st</sup> tertile <214.6 g/day) was associated with higher risk of T2D (HR 1.53, 95% CI 1.06-2.22), with a significant dose-response relationship (p for linear trend = 0.024)                                                                                                                                                                                                                                                                                                                                                         |
| Srouf B. (2020, France) <sup>76</sup>          | NutriNet-Santé cohort (6 y)                                                                          | n = 104,707<br>>18 y<br>(79.2%)                                                                                       | 24-hour dietary recall<br>NOVA classification (% of total food weight and g/day)                                                                                                                  | A 10% increment in UPF consumption was associated with a higher risk for T2D (HR 1.13, 95% CI 1.03-1.23). For a 100 g/day increment in UPF consumption (HR 1.05, 95% CI 1.02-1.08)                                                                                                                                                                                                                                                                                                                                                                                                                            |
| <b>Cross-sectional studies</b>                 |                                                                                                      |                                                                                                                       |                                                                                                                                                                                                   |                                                                                                                                                                                                                                                                                                                                                                                                                                                                                                                                                                                                               |
| Nardocci M. (2021, Canada) <sup>106</sup>      | Canadian Community Health Survey (CCHS)-nutrition                                                    | n = 13,608<br>>19 y<br>(50%)                                                                                          | 24-hour dietary recall<br>NOVA classification (% of total kCal)                                                                                                                                   | Higher UPF consumption (3 <sup>rd</sup> tertile ≥58.7% kCal/day vs. 1 <sup>st</sup> ≤38.5% kCal/day) was associated with higher odds of T2D (OR 1.37, 95% CI 1.01-1.85)                                                                                                                                                                                                                                                                                                                                                                                                                                       |

FFQ, food frequency questionnaire; HR, hazard ratio; OR, odds ratio; T2D, type 2 diabetes; UPF, ultra-processed food.

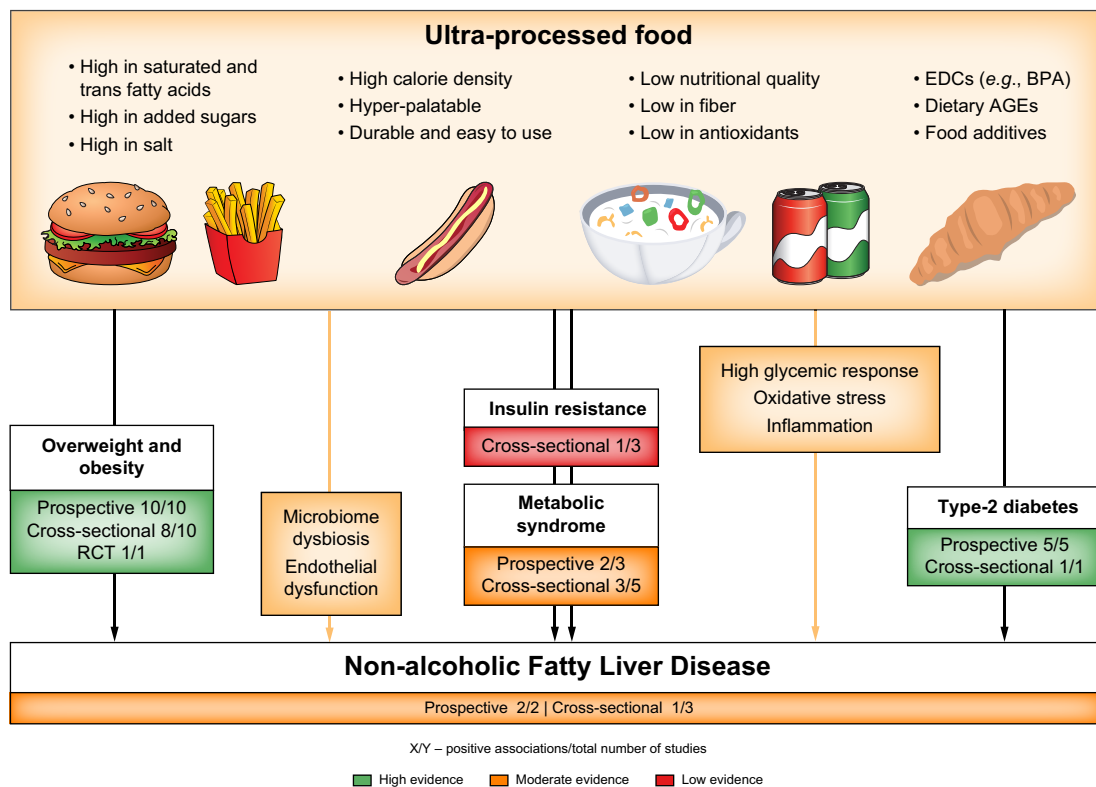

**Fig. 2. Ultra-processed food consumption and NAFLD, its major risk factors, and plausible mechanisms underlying the associations.** The effect of UPF on NAFLD can be explained through several pathways. First, the poor nutritional value of UPF. Second, non-nutritional food compounds or additives within UPF (e.g., EDCs and AGEs) through their pro-oxidative and proinflammatory properties. Lastly, dietary factors common in UPF were found to alter gut microbiome composition (dysbiosis), including saturated fatty acids, fructose, and food additives. AGEs, advanced glycated end products; BPA, bisphenol A; EDCs, endocrine-disrupting chemicals; NAFLD, non-alcoholic fatty liver disease; UPF, ultra-processed food.

inflammatory and oxidative stress markers and increased adiponectin.<sup>91</sup>

Lastly, alterations in microbiome composition and the abundance of specific taxa have repeatedly been related to the pathophysiology of NAFLD and NASH.<sup>92–94</sup> Multiple factors influence gut microbiome composition, with a leading role for environmental factors, including those associated with lifestyle and diet.<sup>95,96</sup> Dietary factors common in UPF were found to negatively influence and alter gut microbiome composition (dysbiosis), including SFAs, fructose, food additives, and AGEs.<sup>97,98</sup> These dietary factors contribute to the pathogenesis of obesity-related disorders, including MetS and NAFLD.<sup>99</sup> Only a few studies examined the association between UPF consumption and gut microbiota. Among elderly individuals with obesity and MetS, there were associations between higher UPF consumption and different taxa abundances (Alloprevotella, Negativibacillus, Prevotella, and Sutterella).<sup>100</sup> Moreover, alpha diversity was significantly lower in males who consumed more than five servings/day of UPF.<sup>101</sup> None of those studies found significant results in terms of beta diversity and Firmicutes-Bacteroidetes ratio.

The present systematic review has several limitations that should be addressed. First, as mentioned above, the included studies were mainly observational and thus prone to reverse causality (in the cross-sectional studies) and residual confounding. However, RCTs with “hard endpoints”, such as NAFLD incidence, are very difficult or impossible to conduct. Second, in reported nutritional intake, there is a possibility of a recall bias, although it is non-differential in prospective studies and thus

can only lead to an underestimation of the associations. In fact, all of the tools applied for dietary assessment were based on self-reported intake (food frequency questionnaire, 24-hour recalls, and food diaries) and were not previously validated or specifically designed to capture dietary data at the level of food processing and specifically for NOVA classification. New technology-based dietary assessment methods should be adapted (web-based and mobile device applications), allowing participants to choose specific products from various market products available, enabling a better evaluation of the product’s specific industrial processing, additives used, packing method, etc. Third, none of the studies determined NAFLD and IR with their gold standard diagnostic tools – liver biopsy and glucose clamp, respectively. Nevertheless, the non-invasive methods used in the included studies are validated and accepted diagnostic tools appropriate for epidemiological studies.<sup>102,103</sup> Finally, a possible publication bias might be expected in favor of significant findings regarding UPF consumption and health outcomes.

In turn, our study presents several strengths. Among them is an extensive exploratory investigation for the widest possible range of accurate keywords, followed by a rigorous literature search and selection process. Additionally, as opposed to a parallel systematic review and meta-analysis that examined the association between UPF consumption and NAFLD,<sup>104</sup> special attention was made to evaluate the exposure to UPF precisely and to distinguish the relevant studies that focus on the assessment of UPF as a whole and not on overlapping dietary

patterns as “Western” and “fast-food” or on specific groups of processed food (e.g., processed meat). Another strong point was the variability of the populations studied, strengthening the external validity of the findings and highlighting their worldwide relevance. In particular, the various countries studied have diverse consumption of UPF. According to a 2021 systematic review,<sup>31</sup> worldwide consumption of UPF (as a % of total energy intake) ranges from 8–51.2% in Brazil to 19–24% and 17–33% in Spain and France, with the highest percentages in the UK and the US (>50%). To our knowledge, no study evaluated the proportion of UPF from total energy intake in China. Still, according to the China Health and Nutrition Survey results,<sup>68</sup> the mean UPF consumption increased almost four times from 1997 to 2011, with a daily food weight proportion of UPF from 1.0–3.6%.

In conclusion, research on the association of UPF with NAFLD and related metabolic alterations was mostly conducted in recent years, with insufficient studies to draw a firm conclusion. However, current evidence from higher-quality

studies shows that UPF is a potential risk factor for NAFLD and MetS. These findings are in accordance with previous systematic reviews that assessed the association of UPF consumption with other diet-related NCDs, mostly obesity and T2D, as was also comprehensively demonstrated in our study. Taken together, it would seem reasonable to advise minimizing UPF consumption, implemented by increasing awareness of its harmful health effects among the general public and patients, using mandatory front-of-pack food labeling, as well as applying policy measures of taxation of UPF, restricting its advertising and marketing while subsidizing minimally processed foods. Since the growing UPF consumption is a worldwide concern with significant public health implications, elaborating on its effects on liver disease and other NCDs is a priority. Future research should have a prospective design, epidemiological or interventional, use dietary assessment tools designed specifically for food processing evaluation, assess validated clinical liver outcomes, and be supported by mechanistic studies to establish causality.

### Abbreviations

AUS, abdominal ultrasound; AGEs, advanced glycated end products; BPA, bisphenol A; EDCs, endocrine-disrupting chemicals; HFCS, high-fructose corn syrup; HRs, hazard ratios; IR, insulin resistance; MASLD, metabolic dysfunction-associated steatotic liver disease; MeSH, Medical Subject Headings; MetS, metabolic syndrome; MRI, magnetic resonance imaging; MRS, magnetic resonance spectroscopy; NAFLD, non-alcoholic fatty liver disease; NASH, non-alcoholic steatohepatitis; NCDs, non-communicable diseases; ORs, odds ratios; RCT, randomized-controlled trial; RoB 2, risk of bias 2 (Cochrane tool); RRs, relative risks; SFAs, saturated fatty acids; T2D, type-2 diabetes; UPF, ultra-processed food.

### Financial support

The authors did not receive any financial support to produce this manuscript.

### Conflict of interest

The authors of this study declare that they do not have any conflict of interest.

Please refer to the accompanying ICMJE disclosure forms for further details.

### Authors' contributions

Laura Sol Grinshpan and Shira Zelber-Sagi; conceived the research question, developed the methods, conducted data collection and analysis, and drafted the manuscript. Sigal Eilat-Adar and Michal Gillon-Keren; conceived the research question and provided input on data analysis, interpretation, and manuscript drafting. Dana Ivancovsky-Wajcman and Revital Kariv; critically reviewed the manuscript. All authors approved the final version of the manuscript.

### Data availability statement

The data presented in this study are available on request from the corresponding author.

### Acknowledgments

We would like to express our appreciation to Amy Lauren Shapira (BPT, MA) and Ronit Marco (BSc, MA) from the University of Haifa library service for systematic reviews for their invaluable guidance and support throughout the search process.

### Supplementary data

Supplementary data to this article can be found online at <https://doi.org/10.1016/j.jhepr.2023.100964>.

### References

*Author names in bold designate shared co-first authorship*

- [1] **Rinella ME, Lazarus JV, Ratziu V, et al.** A multi-society Delphi consensus statement on new fatty liver disease nomenclature. *Hepatology* 2023;78(6):1966–1986.
- [2] **Riazi K, Azhari H, Charette JH, et al.** The prevalence and incidence of NAFLD worldwide: a systematic review and meta-analysis. *Lancet Gastroenterol Hepatol* 2022;7(9):851–861.
- [3] **Sayiner M, Koenig A, Henry L, et al.** Epidemiology of nonalcoholic fatty liver disease and nonalcoholic steatohepatitis in the United States and the rest of the world. *Clin Liver Dis* 2016;20(2):205–214.
- [4] **Adams LA, Anstee QM, Tilg H, et al.** Non-alcoholic fatty liver disease and its relationship with cardiovascular disease and other extrahepatic diseases. *Gut* 2017;66(6):1138–1153.
- [5] **Smits MM, Ioannou GN, Boyko EJ, et al.** Non-alcoholic fatty liver disease as an independent manifestation of the metabolic syndrome: results of a US national survey in three ethnic groups. *J Gastroenterol Hepatol* 2013;28(4):664–670.
- [6] **Jarvis H, Craig D, Barker R, et al.** Metabolic risk factors and incident advanced liver disease in non-alcoholic fatty liver disease (NAFLD): a systematic review and meta-analysis of population-based observational studies. *PLoS Med* 2020;17(4):e1003100.
- [7] **Marusic M, Paic M, Knobloch M, et al.** NAFLD, insulin resistance, and diabetes mellitus type 2. *Can J Gastroenterol Hepatol* 2021;2021:6613827.
- [8] **Li L, Liu DW, Yan HY, et al.** Obesity is an independent risk factor for non-alcoholic fatty liver disease: evidence from a meta-analysis of 21 cohort studies. *Obes Rev* 2016;17(6):510–519.
- [9] **Quek J, Chan KE, Wong ZY, et al.** Global prevalence of non-alcoholic fatty liver disease and non-alcoholic steatohepatitis in the overweight and obese population: a systematic review and meta-analysis. *Lancet Gastroenterol Hepatol* 2023;8(1):20–30.
- [10] **Younossi ZM, Golabi P, de Avila L, et al.** The global epidemiology of NAFLD and NASH in patients with type 2 diabetes: a systematic review and meta-analysis. *J Hepatol* 2019;71(4):793–801.
- [11] **Zohara Z, Adelekun A, Seffah KD, et al.** The prospect of non-alcoholic fatty liver disease in adult patients with metabolic syndrome: a systematic review. *Cureus* 2023;15(7):e41959.
- [12] **Hallsworth K, Thoma C, Moore S, et al.** Non-alcoholic fatty liver disease is associated with higher levels of objectively measured sedentary behaviour and lower levels of physical activity than matched healthy controls. *Front Gastroenterol* 2015;6(1):44–51.
- [13] **Ullah R, Rauf N, Nabi G, et al.** Role of nutrition in the pathogenesis and prevention of non-alcoholic fatty liver disease: recent updates. *Int J Biol Sci* 2019;15(2):265–276.

- [14] Rinella ME, Neuschwander-Tetri BA, Siddiqui MS, et al. AASLD practice guidance on the clinical assessment and management of nonalcoholic fatty liver disease. *Hepatology* 2023;77(5):1797–1835.
- [15] Zelber-Sagi S, Grinshpan LS, Ivancovsky-Wajcman D, et al. One size does not fit all; practical, personal tailoring of the diet to NAFLD patients. *Liver Int* 2022;42(8):1731–1750.
- [16] Semmler G, Datz C, Reiberger T, et al. Diet and exercise in NAFLD/NASH: beyond the obvious. *Liver Int* 2021;41(10):2249–2268.
- [17] Hassani Zadeh S, Mansoori A, Hosseinzadeh M. Relationship between dietary patterns and non-alcoholic fatty liver disease: a systematic review and meta-analysis. *J Gastroenterol Hepatol* 2021;36(6):1470–1478.
- [18] Ivancovsky-Wajcman D, Fliss-Isakov N, Grinshpan LS, et al. High meat consumption is prospectively associated with the risk of non-alcoholic fatty liver disease and presumed significant fibrosis. *Nutrients* 2022;14(17):3533.
- [19] Salomone F, Ivancovsky-Wajcman D, Fliss-Isakov N, et al. Higher phenolic acid intake independently associates with lower prevalence of insulin resistance and non-alcoholic fatty liver disease. *JHEP Rep* 2020;2(2):100069.
- [20] Vancells Lujan P, Vinas Esmel E, Sacanella Meseguer E. Overview of Non-Alcoholic Fatty Liver Disease (NAFLD) and the role of sugary food consumption and other dietary components in its development. *Nutrients* 2021;13(5):1442.
- [21] Rosqvist F, Iggman D, Kullberg J, et al. Overfeeding polyunsaturated and saturated fat causes distinct effects on liver and visceral fat accumulation in humans. *Diabetes* 2014;63(7):2356–2368.
- [22] Hernandez EA, Kahl S, Seelig A, et al. Acute dietary fat intake initiates alterations in energy metabolism and insulin resistance. *J Clin Invest* 2017;127(2):695–708.
- [23] Luukkonen PK, Sadevirta S, Zhou Y, et al. Saturated fat is more metabolically harmful for the human liver than unsaturated fat or simple sugars. *Diabetes Care* 2018;41(8):1732–1739.
- [24] He K, Li Y, Guo X, et al. Food groups and the likelihood of non-alcoholic fatty liver disease: a systematic review and meta-analysis. *Br J Nutr* 2020;124(1):1–13.
- [25] Jensen T, Abdelmalek MF, Sullivan S, et al. Fructose and sugar: a major mediator of non-alcoholic fatty liver disease. *J Hepatol* 2018;68(5):1063–1075.
- [26] Monteiro CA, Cannon G, Levy RB, et al. Ultra-processed foods: what they are and how to identify them. *Public Health Nutr* 2019;22(5):936–941.
- [27] Monteiro CA, Cannon G, Lawrence M, et al. Ultra-processed foods, diet quality, and health using the NOVA classification system. 2019.
- [28] Monteiro CA, Cannon G, Moubarac JC, et al. The UN Decade of Nutrition, the NOVA food classification and the trouble with ultra-processing. *Public Health Nutr* 2018;21(1):5–17.
- [29] Popkin B. Ultra-processed foods' impacts on health. In: 2030 Food, Agriculture and rural development in Latin America and the Caribbean; 2019.
- [30] Monteiro CA, Moubarac JC, Levy RB, et al. Household availability of ultra-processed foods and obesity in nineteen European countries. *Public Health Nutr* 2018;21(1):18–26.
- [31] Marino M, Puppo F, Del Bo C, et al. A systematic review of worldwide consumption of ultra-processed foods: findings and criticisms. *Nutrients* 2021;13(8):2778.
- [32] Rauber F, Louzada M, Martinez Steele E, et al. Ultra-processed foods and excessive free sugar intake in the UK: a nationally representative cross-sectional study. *BMJ Open* 2019;9(10):e027546.
- [33] Baraldi LG, Martinez Steele E, Canella DS, et al. Consumption of ultra-processed foods and associated sociodemographic factors in the USA between 2007 and 2012: evidence from a nationally representative cross-sectional study. *BMJ Open* 2018;8(3):e020574.
- [34] Marron-Ponce JA, Flores M, Cediel G, et al. Associations between consumption of ultra-processed foods and intake of nutrients related to chronic non-communicable diseases in Mexico. *J Acad Nutr Diet* 2019;119(11):1852–1865.
- [35] Costa Louzada ML, Martins AP, Canella DS, et al. Ultra-processed foods and the nutritional dietary profile in Brazil. *Rev Saude Publica* 2015;49:38.
- [36] Delpino FM, Figueiredo LM, Bielemann RM, et al. Ultra-processed food and risk of type 2 diabetes: a systematic review and meta-analysis of longitudinal studies. *Int J Epidemiol* 2022;51(4):1120–1141.
- [37] Lane MM, Davis JA, Beattie S, et al. Ultraprocessed food and chronic noncommunicable diseases: a systematic review and meta-analysis of 43 observational studies. *Obes Rev* 2021;22(3):1–19.
- [38] Askari M, Heshmati J, Shahinfar H, et al. Ultra-processed food and the risk of overweight and obesity: a systematic review and meta-analysis of observational studies. *Int J Obes (Lond)* 2020;44(10):2080–2091.
- [39] Pagliai G, Dinu M, Madarena MP, et al. Consumption of ultra-processed foods and health status: a systematic review and meta-analysis. *Br J Nutr* 2021;125(3):308–318.
- [40] Moradi S, Entezari MH, Mohammadi H, et al. Ultra-processed food consumption and adult obesity risk: a systematic review and dose-response meta-analysis. *Crit Rev Food Sci Nutr* 2023;63(2):249–260.
- [41] Chen Z, Khandpur N, Desjardins C, et al. Ultra-processed food consumption and risk of type 2 diabetes: three large prospective US cohort studies. *Diabetes Care* 2023;46(7):1335–1344.
- [42] Page MJ, McKenzie JE, Bossuyt PM, et al. The PRISMA 2020 statement: an updated guideline for reporting systematic reviews. *BMJ* 2021;372:n71.
- [43] Moubarac JC, Parra DC, Cannon G, et al. Food classification systems based on food processing: significance and implications for policies and actions: a systematic literature review and assessment. *Curr Obes Rep* 2014;3(2):256–272.
- [44] Chen H, Wang J, Li Z, et al. Consumption of sugar-sweetened beverages has a dose-dependent effect on the risk of non-alcoholic fatty liver disease: an updated systematic review and dose-response meta-analysis. *Int J Environ Res Public Health* 2019;16(12):2192.
- [45] Peng X, Li J, Zhao H, et al. Lifestyle as well as metabolic syndrome and non-alcoholic fatty liver disease: an umbrella review of evidence from observational studies and randomized controlled trials. *BMC Endocr Disord* 2022;22(1):95.
- [46] Moola S, Munn Z, Tufanaru C, et al. Chapter 7: systematic reviews of etiology and risk. In: Aromataris E, Munn Z, editors. *JBI manual for evidence synthesis*. JBI; 2020. Available from: <https://doi.org/10.46658/JBIMES-20-082020>.
- [47] Sterne JAC, Savović J, Page MJ, et al. RoB 2: a revised tool for assessing risk of bias in randomised trials. *BMJ* 2019;366:14898.
- [48] Zhang S, Gan S, Zhang Q, et al. Ultra-processed food consumption and the risk of non-alcoholic fatty liver disease in the Tianjin chronic low-grade systemic inflammation and health cohort study. *Int J Epidemiol* 2022;51(1):237–249.
- [49] Konieczna J, Fiol M, Colom A, et al. Does consumption of ultra-processed foods matter for liver health? Prospective analysis among older adults with metabolic syndrome. *Nutrients* 2022;14(19):4142.
- [50] Liu Z, Huang H, Zeng Y, et al. Association between ultra-processed foods consumption and risk of non-alcoholic fatty liver disease: a population-based analysis of NHANES 2011–2018. *Br J Nutr* 2023;130(6):996–1004.
- [51] Ivancovsky-Wajcman D, Fliss-Isakov N, Webb M, et al. Ultra-processed food is associated with features of metabolic syndrome and non-alcoholic fatty liver disease. *Liver Int* 2021;41(11):2635–2645.
- [52] Friden M, Kullberg J, Ahlstrom H, et al. Intake of ultra-processed food and ectopic-, visceral- and other fat depots: a cross-sectional study. *Front Nutr* 2022;9:774718.
- [53] Hall KD, Ayuketah A, Brychta R, et al. Ultra-processed diets cause excess calorie intake and weight gain: an inpatient randomized controlled trial of ad libitum food intake. *Cell Metab* 2020;32(4):690.
- [54] Canhada SL, Vigo Á, Luft VC, et al. Ultra-processed food consumption and increased risk of metabolic syndrome in adults: the ELSA-Brasil. *Diabetes Care* 2023;46(2):369–376.
- [55] Pan F, Wang Z, Wang H, et al. Association between ultra-processed food consumption and metabolic syndrome among adults in China—results from the China health and nutrition survey. *Nutrients* 2023;15(3):752.
- [56] Magalhaes E, de Oliveira BR, Rudakoff LCS, et al. Sex-dependent effects of the intake of NOVA classified ultra-processed foods on syndrome metabolic components in Brazilian adults. *Nutrients* 2022;14(15):3126.
- [57] Martinez Steele E, Juul F, Neri D, et al. Dietary share of ultra-processed foods and metabolic syndrome in the US adult population. *Prev Med* 2019;125:40–48.
- [58] Lavigne-Robichaud M, Moubarac JC, Lantagne-Lopez S, et al. Diet quality indices in relation to metabolic syndrome in an Indigenous Cree (Eeyouch) population in northern Quebec, Canada. *Public Health Nutr* 2018;21(1):172–180.
- [59] Barbosa LB, Vasconcelos NBR, Dos Santos EA, et al. Ultra-processed food consumption and metabolic syndrome: a cross-sectional study in Quilombola communities of Alagoas, Brazil. *Int J Equity Health* 2023;22(1):14.
- [60] Nasreddine L, Tamim H, Itani L, et al. A minimally processed dietary pattern is associated with lower odds of metabolic syndrome among Lebanese adults. *Public Health Nutr* 2018;21(1):160–171.



- [61] Hosseini D, Shirase F, Noori S, et al. The relationship between ultra-processed food intake and cardiometabolic risk factors in overweight and obese women: a cross-sectional study. *Front Nutr* 2022;9: 945591.
- [62] Meneguelli TS, Juvanhol LL, Leite AD, et al. Minimally processed versus processed and ultra-processed food in individuals at cardiometabolic risk. *Br Food J* 2022;124(3):811–832.
- [63] Beslay M, Srour B, Mejean C, et al. Ultra-processed food intake in association with BMI change and risk of overweight and obesity: a prospective analysis of the French NutriNet-Sante cohort. *PLoS Med* 2020;17(8):1–19.
- [64] Rauber F, Chang K, Vámos EP, et al. Ultra-processed food consumption and risk of obesity: a prospective cohort study of UK Biobank. *Eur J Nutr* 2021;60(4):2169–2180.
- [65] Mendonca RD, Pimenta AM, Gea A, et al. Ultraprocessed food consumption and risk of overweight and obesity: the University of Navarra Follow-Up (SUN) cohort study. *Am J Clin Nutr* 2016;104(5):1433–1440.
- [66] Canhada SL, Luft VC, Giatti L, et al. Ultra-processed foods, incident overweight and obesity, and longitudinal changes in weight and waist circumference: the Brazilian Longitudinal Study of Adult Health (ELSA-Brasil). *Public Health Nutr* 2020;23(6):1076–1086.
- [67] Konicznia J, Morey M, Abete I, et al. Contribution of ultra-processed foods in visceral fat deposition and other adiposity indicators: prospective analysis nested in the PREDIMED-Plus trial. *Clin Nutr* 2021;40(6):4290–4300.
- [68] Li M, Shi Z. Ultra-processed food consumption associated with overweight/obesity among Chinese adults—results from China health and nutrition survey 1997–2011. *Nutrients* 2021;13(8):2796.
- [69] Cordova R, Kliemann N, Huybrechts I, et al. Consumption of ultra-processed foods associated with weight gain and obesity in adults: a multi-national cohort study. *Clin Nutr* 2021;40(9):5079–5088.
- [70] Sandoval-Insausti H, Jimenez-Onsurbe M, Donat-Vargas C, et al. Ultra-processed food consumption is associated with abdominal obesity: a prospective cohort study in older adults. *Nutrients* 2020;12(8):2368.
- [71] Adams J, White M. Characterisation of UK diets according to degree of food processing and associations with socio-demographics and obesity: cross-sectional analysis of UK National Diet and Nutrition Survey (2008–12). *Int J Behav Nutr Phys Act* 2015;12(1):160.
- [72] Asma A, Gan HJ, Hayati MY, et al. Food classification system based on food processing and its relationship with nutritional status of adults in Terengganu, Malaysia. *Food Res* 2019;4(2):539–546.
- [73] Juul F, Martinez-Steele E, Parekh N, et al. Ultra-processed food consumption and excess weight among US adults. *Br J Nutr* 2018;120(1):90–100.
- [74] Rauber F, Steele EM, Louzada M, et al. Ultra-processed food consumption and indicators of obesity in the United Kingdom population (2008–2016). *PLoS One* 2020;15(5):1–15.
- [75] Machado PP, Steele EM, Levy RB, et al. Ultra-processed food consumption and obesity in the Australian adult population. *Nutr Diabetes* 2020;10(1):39.
- [76] Srour B, Fezeu LK, Kesse-Guyot E, et al. Ultraprocessed food consumption and risk of type 2 diabetes among participants of the NutriNet-santé prospective cohort. *JAMA Intern Med* 2020;180(2):283–291.
- [77] Duan MJ, Vinke PC, Navis G, et al. Ultra-processed food and incident type 2 diabetes: studying the underlying consumption patterns to unravel the health effects of this heterogeneous food category in the prospective Lifelines cohort. *BMC Med* 2022;20(1):7.
- [78] Llaveró-Valero M, Escalada-San Martín J, Martínez-González MA, et al. Ultra-processed foods and type-2 diabetes risk in the SUN project: a prospective cohort study. *Clin Nutr* 2021;40(5):2817–2824.
- [79] Levy RB, Rauber F, Chang K, et al. Ultra-processed food consumption and type 2 diabetes incidence: a prospective cohort study. *Clin Nutr* 2021;40(5):3608–3614.
- [80] Jemal A, Girum T, Kedir S, et al. Metabolic syndrome and its predictors among adults seeking medical care: a trending public health concern. *Clin Nutr ESPEN* 2023;54:264–270.
- [81] Cano R, Perez JL, Davila LA, et al. Role of endocrine-disrupting chemicals in the pathogenesis of non-alcoholic fatty liver disease: a comprehensive review. *Int J Mol Sci* 2021;22(9):4807.
- [82] Ravichandran G, Lakshmanan DK, Arunachalam A, et al. Food obesogens as emerging metabolic disruptors: A toxicological insight. *J Steroid Biochem Mol Biol* 2022;217:106042.
- [83] Litwinowicz K, Waszczuk E, Gamian A. Advanced glycation end-products in common non-infectious liver diseases: systematic review and meta-analysis. *Nutrients* 2021;13(10):3370.
- [84] Jahromi MK, Tehrani AN, Teymoori F, et al. Dietary advanced glycation end products are associated with an increased risk of non-alcoholic fatty liver disease in Iranian adults. *BMC Endocr Disord* 2023;23(1):111.
- [85] Dallio M, Masarone M, Errico S, et al. Role of bisphenol A as environmental factor in the promotion of non-alcoholic fatty liver disease: in vitro and clinical study. *Aliment Pharmacol Ther* 2018;47(6):826–837.
- [86] Buckley JP, Kim H, Wong E, et al. Ultra-processed food consumption and exposure to phthalates and bisphenols in the US national health and nutrition examination survey, 2013–2014. *Environ Int* 2019;131:105057.
- [87] Steele EM, Khandpur N, da Costa Louzada ML, et al. Association between dietary contribution of ultra-processed foods and urinary concentrations of phthalates and bisphenol in a nationally representative sample of the US population aged 6 years and older. *PLoS ONE* 2020;15(7): e0236738.
- [88] Fernando DH, Forbes JM, Angus PW, et al. Development and progression of non-alcoholic fatty liver disease: the role of advanced glycation end products. *Int J Mol Sci* 2019;20(20):5037.
- [89] Kellow NJ, Savage GS. Dietary advanced glycation end-product restriction for the attenuation of insulin resistance, oxidative stress and endothelial dysfunction: a systematic review. *Eur J Clin Nutr* 2013;67(3):239–248.
- [90] Sohoulí MH, Fatahi S, Sharifi-Zahabi E, et al. The impact of low advanced glycation end products diet on metabolic risk factors: a systematic review and meta-analysis of randomized controlled trials. *Adv Nutr* 2021;12(3):766–776.
- [91] Baye E, Kiriakova V, Uribarri J, et al. Consumption of diets with low advanced glycation end products improves cardiometabolic parameters: meta-analysis of randomised controlled trials. *Sci Rep* 2017;7(1):1–9.
- [92] Roychowdhury S, Selvakumar PC, Cresci GAM. The role of the gut microbiome in nonalcoholic fatty liver disease. *Med Sci (Basel)* 2018;6(2):47.
- [93] Sharpston SR, Schnabl B, Knight R, et al. Current concepts, opportunities, and challenges of gut microbiome-based personalized medicine in nonalcoholic fatty liver disease. *Cell Metab* 2021;33(1):21–32.
- [94] Sharpston SR, Ajmera V, Loomba R. Emerging role of the gut microbiome in nonalcoholic fatty liver disease: from composition to function. *Clin Gastroenterol Hepatol* 2019;17(2):296–306.
- [95] Ahn J, Hayes RB. Environmental influences on the human microbiome and implications for noncommunicable disease. *Annu Rev Public Health* 2021;42:277–292.
- [96] Rothschild D, Weissbrod O, Barkan E, et al. Environment dominates over host genetics in shaping human gut microbiota. *Nature* 2018;555(7695):210–215.
- [97] Jennison E, Byrne CD. The role of the gut microbiome and diet in the pathogenesis of non-alcoholic fatty liver disease. *Clin Mol Hepatol* 2021;27(1):22–43.
- [98] Phuong-Nguyen K, McNeill BA, Aston-Mourney K, et al. Advanced glycation end-products and their effects on gut health. *Nutrients* 2023;15(2):405.
- [99] Leung C, Rivera L, Furness JB, et al. The role of the gut microbiota in NAFLD. *Nat Rev Gastroenterol Hepatol* 2016;13(7):412–425.
- [100] Atzeni A, Martínez M, Babio N, et al. Association between ultra-processed food consumption and gut microbiota in senior subjects with overweight/obesity and metabolic syndrome. *Front Nutr* 2022;9: 976547.
- [101] Cuevas-Sierra A, Milagro FI, Aranaz P, et al. Gut microbiota differences according to ultra-processed food consumption in a Spanish population. *Nutrients* 2021;13(8):2710.
- [102] Muniyappa R, Madan R, Varghese RT, et al. Assessing insulin sensitivity and resistance in humans [Updated 2021 Aug 9]. South Dartmouth (MA): MDText.com, Inc.; 2020. Available from: <https://www.ncbi.nlm.nih.gov/sites/books/NBK278954/>.
- [103] Zhou JH, Cai JJ, She ZG, et al. Noninvasive evaluation of nonalcoholic fatty liver disease: current evidence and practice. *World J Gastroenterol* 2019;25(11):1307–1326.
- [104] Henney AE, Gillespie CS, Alam U, et al. Ultra-processed food intake is associated with non-alcoholic fatty liver disease in adults: a systematic review and meta-analysis. *Nutrients* 2023;15(10):2266.
- [105] Martínez-Perez C, San-Cristóbal R, Guallar-Castillón P, et al. Use of different food classification systems to assess the association between ultra-processed food consumption and cardiometabolic health in an elderly population with metabolic syndrome (PREDIMED-Plus cohort). *Nutrients* 2021;13(7):2471.
- [106] Nardocci M, Polisky JY, Moubarac JC. Consumption of ultra-processed foods is associated with obesity, diabetes and hypertension in Canadian adults. *Can J Public Health* 2021;112(3):421–429.

- [107] Nardocci M, Leclerc BS, Louzada ML, et al. Consumption of ultra-processed foods and obesity in Canada. *Can J Public Health* 2019;110(1):4–14.
- [108] Silva FM, Giatti L, de Figueiredo RC, et al. Consumption of ultra-processed food and obesity: cross sectional results from the Brazilian Longitudinal Study of Adult Health (ELSA-Brasil) cohort (2008–2010). *Public Health Nutr* 2018;21(12):2271–2279.
- [109] Alberti KG, Eckel RH, Grundy SM, et al. Harmonizing the metabolic syndrome: a joint interim statement of the international diabetes federation task force on epidemiology and prevention; National Heart, Lung, and Blood Institute; American Heart Association; World Heart Federation; International Atherosclerosis Society; and International Association for the Study of Obesity. *Circulation* 2009;120(16):1640–1645.
- [110] Arnett DK, Blumenthal RS, Albert MA, et al. 2019 ACC/AHA guideline on the primary prevention of cardiovascular disease: a report of the American College of Cardiology/American Heart Association Task Force on Clinical Practice Guidelines. *Circulation* 2019;140(11):e596–e646.
- [111] Heng D, Ma S, Lee JJ, et al. Modification of the NCEP ATP III definitions of the metabolic syndrome for use in Asians identifies individuals at risk of ischemic heart disease. *Atherosclerosis* 2006;186(2):367–373.

**Journal of Hepatology, Volume 6**

**Supplemental information**

**Ultra-processed food consumption and non-alcoholic fatty liver disease, metabolic syndrome and insulin resistance: A systematic review**

**Laura Sol Grinshpan, Sigal Eilat-Adar, Dana Ivancovsky-Wajcman, Revital Kariv, Michal Gillon-Keren, and Shira Zelber-Sagi**

# Ultra-processed food consumption and non-alcoholic fatty liver disease, metabolic syndrome and insulin resistance: a systematic review

Laura Sol Grinshpan<sup>1,2</sup> RD; Sigal Eilat-Adar<sup>3</sup> RD, Ph.D.; Dana Ivancovsky-Wajcman<sup>1,2</sup> RD, Ph.D.; Revital Kariv<sup>2,4</sup> MD; Michal Gillon-Keren<sup>5,6</sup> RD, Ph.D.; Shira Zelber-Sagi<sup>1,2</sup> RD, Ph.D.

<sup>1</sup>School of Public Health, Faculty of Social Welfare and Health Sciences, University of Haifa, Haifa, Israel

<sup>2</sup>Department of Gastroenterology Tel-Aviv Medical Center, Tel-Aviv, Israel

<sup>3</sup>The Academic College Levinsky-Wingate, Netanya, Israel

<sup>4</sup>Faculty of Medicine, Tel-Aviv University, Tel-Aviv, Israel

<sup>5</sup>Institute of Endocrinology and Diabetes, Schneider Children’s Medical Center, Petah Tikva, Israel

<sup>6</sup>Faculty of Sciences, Kibbutzim College of Education Technology and the Arts, Tel Aviv, Israel

## Supplementary data

### Table of contents

|                                          |           |
|------------------------------------------|-----------|
| <b>PRISMA 2020 Checklist</b> .....       | <b>2</b>  |
| <b>Search results</b> .....              | <b>5</b>  |
| <b>keyword search strategy</b> .....     | <b>10</b> |
| <b>Excluded full text articles</b> ..... | <b>12</b> |
| <b>Quality assessment</b> .....          | <b>13</b> |
| <b>References</b> .....                  | <b>17</b> |

## PRISMA 2020 Checklist

**Table S1. PRISMA 2020 Checklist**

| Section and Topic             | Item # | Checklist item                                                                                                                                                                                                                                                                                       | Location where item is reported |
|-------------------------------|--------|------------------------------------------------------------------------------------------------------------------------------------------------------------------------------------------------------------------------------------------------------------------------------------------------------|---------------------------------|
| <b>TITLE</b>                  |        |                                                                                                                                                                                                                                                                                                      |                                 |
| Title                         | 1      | Identify the report as a systematic review.                                                                                                                                                                                                                                                          | Page 1                          |
| <b>ABSTRACT</b>               |        |                                                                                                                                                                                                                                                                                                      |                                 |
| Abstract                      | 2      | See the PRISMA 2020 for Abstracts checklist.                                                                                                                                                                                                                                                         | Page 1                          |
| <b>INTRODUCTION</b>           |        |                                                                                                                                                                                                                                                                                                      |                                 |
| Rationale                     | 3      | Describe the rationale for the review in the context of existing knowledge.                                                                                                                                                                                                                          | Pages 1, 2                      |
| Objectives                    | 4      | Provide an explicit statement of the objective(s) or question(s) the review addresses.                                                                                                                                                                                                               | Page 2                          |
| <b>METHODS</b>                |        |                                                                                                                                                                                                                                                                                                      |                                 |
| Eligibility criteria          | 5      | Specify the inclusion and exclusion criteria for the review and how studies were grouped for the syntheses.                                                                                                                                                                                          | Page 2                          |
| Information sources           | 6      | Specify all databases, registers, websites, organisations, reference lists and other sources searched or consulted to identify studies. Specify the date when each source was last searched or consulted.                                                                                            | Pages 2                         |
| Search strategy               | 7      | Present the full search strategies for all databases, registers and websites, including any filters and limits used.                                                                                                                                                                                 | Suppl. Tables S2, S3            |
| Selection process             | 8      | Specify the methods used to decide whether a study met the inclusion criteria of the review, including how many reviewers screened each record and each report retrieved, whether they worked independently, and if applicable, details of automation tools used in the process.                     | Page 2                          |
| Data collection process       | 9      | Specify the methods used to collect data from reports, including how many reviewers collected data from each report, whether they worked independently, any processes for obtaining or confirming data from study investigators, and if applicable, details of automation tools used in the process. | N/A                             |
| Data items                    | 10a    | List and define all outcomes for which data were sought. Specify whether all results that were compatible with each outcome domain in each study were sought (e.g. for all measures, time points, analyses), and if not, the methods used to decide which results to collect.                        | Page 2                          |
|                               | 10b    | List and define all other variables for which data were sought (e.g. participant and intervention characteristics, funding sources). Describe any assumptions made about any missing or unclear information.                                                                                         | Page 2                          |
| Study risk of bias assessment | 11     | Specify the methods used to assess risk of bias in the included studies, including details of the tool(s) used, how many reviewers assessed each study and whether they worked independently, and if applicable, details of automation tools used in the process.                                    | Page 2, 3                       |
| Effect measures               | 12     | Specify for each outcome the effect measure(s) (e.g. risk ratio, mean difference) used in the synthesis or presentation of results.                                                                                                                                                                  | Tables 1, 2                     |

| Section and Topic             | Item # | Checklist item                                                                                                                                                                                                                                                                       | Location where item is reported |
|-------------------------------|--------|--------------------------------------------------------------------------------------------------------------------------------------------------------------------------------------------------------------------------------------------------------------------------------------|---------------------------------|
| Synthesis methods             | 13a    | Describe the processes used to decide which studies were eligible for each synthesis (e.g. tabulating the study intervention characteristics and comparing against the planned groups for each synthesis (item #5)).                                                                 | Page 2                          |
|                               | 13b    | Describe any methods required to prepare the data for presentation or synthesis, such as handling of missing summary statistics, or data conversions.                                                                                                                                | N/A                             |
|                               | 13c    | Describe any methods used to tabulate or visually display results of individual studies and syntheses.                                                                                                                                                                               | Page 3                          |
|                               | 13d    | Describe any methods used to synthesize results and provide a rationale for the choice(s). If meta-analysis was performed, describe the model(s), method(s) to identify the presence and extent of statistical heterogeneity, and software package(s) used.                          | Page 3                          |
|                               | 13e    | Describe any methods used to explore possible causes of heterogeneity among study results (e.g. subgroup analysis, meta-regression).                                                                                                                                                 | N/A                             |
|                               | 13f    | Describe any sensitivity analyses conducted to assess robustness of the synthesized results.                                                                                                                                                                                         | N/A                             |
| Reporting bias assessment     | 14     | Describe any methods used to assess risk of bias due to missing results in a synthesis (arising from reporting biases).                                                                                                                                                              | N/A                             |
| Certainty assessment          | 15     | Describe any methods used to assess certainty (or confidence) in the body of evidence for an outcome.                                                                                                                                                                                | N/A                             |
| <b>RESULTS</b>                |        |                                                                                                                                                                                                                                                                                      |                                 |
| Study selection               | 16a    | Describe the results of the search and selection process, from the number of records identified in the search to the number of studies included in the review, ideally using a flow diagram.                                                                                         | Figure 1                        |
|                               | 16b    | Cite studies that might appear to meet the inclusion criteria, but which were excluded, and explain why they were excluded.                                                                                                                                                          | Suppl. Table S4                 |
| Study characteristics         | 17     | Cite each included study and present its characteristics.                                                                                                                                                                                                                            | Tables 1, 2                     |
| Risk of bias in studies       | 18     | Present assessments of risk of bias for each included study.                                                                                                                                                                                                                         | Suppl. Table S5                 |
| Results of individual studies | 19     | For all outcomes, present, for each study: (a) summary statistics for each group (where appropriate) and (b) an effect estimate and its precision (e.g. confidence/credible interval), ideally using structured tables or plots.                                                     | Tables 1, 2                     |
| Results of syntheses          | 20a    | For each synthesis, briefly summarise the characteristics and risk of bias among contributing studies.                                                                                                                                                                               | Pages 3, 6                      |
|                               | 20b    | Present results of all statistical syntheses conducted. If meta-analysis was done, present for each the summary estimate and its precision (e.g. confidence/credible interval) and measures of statistical heterogeneity. If comparing groups, describe the direction of the effect. | N/A                             |
|                               | 20c    | Present results of all investigations of possible causes of heterogeneity among study results.                                                                                                                                                                                       | N/A                             |

| Section and Topic                              | Item # | Checklist item                                                                                                                                                                                                                             | Location where item is reported                                                                                                                           |
|------------------------------------------------|--------|--------------------------------------------------------------------------------------------------------------------------------------------------------------------------------------------------------------------------------------------|-----------------------------------------------------------------------------------------------------------------------------------------------------------|
|                                                | 20d    | Present results of all sensitivity analyses conducted to assess the robustness of the synthesized results.                                                                                                                                 | N/A                                                                                                                                                       |
| Reporting biases                               | 21     | Present assessments of risk of bias due to missing results (arising from reporting biases) for each synthesis assessed.                                                                                                                    | N/A                                                                                                                                                       |
| Certainty of evidence                          | 22     | Present assessments of certainty (or confidence) in the body of evidence for each outcome assessed.                                                                                                                                        | N/A                                                                                                                                                       |
| <b>DISCUSSION</b>                              |        |                                                                                                                                                                                                                                            |                                                                                                                                                           |
| Discussion                                     | 23a    | Provide a general interpretation of the results in the context of other evidence.                                                                                                                                                          | Pages 12, 14                                                                                                                                              |
|                                                | 23b    | Discuss any limitations of the evidence included in the review.                                                                                                                                                                            | Pages 12, 14                                                                                                                                              |
|                                                | 23c    | Discuss any limitations of the review processes used.                                                                                                                                                                                      | Page 14                                                                                                                                                   |
|                                                | 23d    | Discuss implications of the results for practice, policy, and future research.                                                                                                                                                             | Page 15                                                                                                                                                   |
| <b>OTHER INFORMATION</b>                       |        |                                                                                                                                                                                                                                            |                                                                                                                                                           |
| Registration and protocol                      | 24a    | Provide registration information for the review, including register name and registration number / state that the review was not registered.                                                                                               | Page 2                                                                                                                                                    |
|                                                | 24b    | Indicate where the review protocol can be accessed, or state that a protocol was not prepared.                                                                                                                                             | Page 2                                                                                                                                                    |
|                                                | 24c    | Describe and explain any amendments to information provided at registration or in the protocol.                                                                                                                                            | N/A                                                                                                                                                       |
| Support                                        | 25     | Describe sources of financial or non-financial support for the review, and the role of the funders or sponsors in the review.                                                                                                              | Page 16                                                                                                                                                   |
| Competing interests                            | 26     | Declare any competing interests of review authors.                                                                                                                                                                                         | Page 16                                                                                                                                                   |
| Availability of data, code and other materials | 27     | Report which of the following are publicly available and where they can be found: template data collection forms; data extracted from included studies; data used for all analyses; analytic code; any other materials used in the review. | Template data collection forms: N/A<br>Data extracted from included studies: Tables 1, 2<br>Data used for all analyses: Tables 1, 2<br>Analytic code: N/A |

From: Page MJ, McKenzie JE, Bossuyt PM, Boutron I, Hoffmann TC, Mulrow CD, et al. The PRISMA 2020 statement: an updated guideline for reporting systematic reviews. *BMJ* 2021;372:n71. doi: 10.1136/bmj.n71. For more information, visit: <http://www.prisma-statement.org/>

## Search results

**Table S2. Search results; Monday, 13 March 2023**

| search ID#    | Search Terms                                                                                                                                                                                                                                                                                                                                                                                                                                                                                                                                                                                                                                                                                                                                                                                                                                                                                                                                                                                                                                                                                                                                                                                                                                                                                                                                                                                                                                                                                                                                                                                                                                                                                                                                                                                                                                                                                                                                                                                                                                                                                                                                                                                                                                                                                                                                                                                                                                                                                                                                                                                                                                                                                                                                                                                                                                                                                                                                                                                                                                                                                             | Results    |
|---------------|----------------------------------------------------------------------------------------------------------------------------------------------------------------------------------------------------------------------------------------------------------------------------------------------------------------------------------------------------------------------------------------------------------------------------------------------------------------------------------------------------------------------------------------------------------------------------------------------------------------------------------------------------------------------------------------------------------------------------------------------------------------------------------------------------------------------------------------------------------------------------------------------------------------------------------------------------------------------------------------------------------------------------------------------------------------------------------------------------------------------------------------------------------------------------------------------------------------------------------------------------------------------------------------------------------------------------------------------------------------------------------------------------------------------------------------------------------------------------------------------------------------------------------------------------------------------------------------------------------------------------------------------------------------------------------------------------------------------------------------------------------------------------------------------------------------------------------------------------------------------------------------------------------------------------------------------------------------------------------------------------------------------------------------------------------------------------------------------------------------------------------------------------------------------------------------------------------------------------------------------------------------------------------------------------------------------------------------------------------------------------------------------------------------------------------------------------------------------------------------------------------------------------------------------------------------------------------------------------------------------------------------------------------------------------------------------------------------------------------------------------------------------------------------------------------------------------------------------------------------------------------------------------------------------------------------------------------------------------------------------------------------------------------------------------------------------------------------------------------|------------|
| <b>Cinhal</b> |                                                                                                                                                                                                                                                                                                                                                                                                                                                                                                                                                                                                                                                                                                                                                                                                                                                                                                                                                                                                                                                                                                                                                                                                                                                                                                                                                                                                                                                                                                                                                                                                                                                                                                                                                                                                                                                                                                                                                                                                                                                                                                                                                                                                                                                                                                                                                                                                                                                                                                                                                                                                                                                                                                                                                                                                                                                                                                                                                                                                                                                                                                          |            |
| S7            | S3 AND S6                                                                                                                                                                                                                                                                                                                                                                                                                                                                                                                                                                                                                                                                                                                                                                                                                                                                                                                                                                                                                                                                                                                                                                                                                                                                                                                                                                                                                                                                                                                                                                                                                                                                                                                                                                                                                                                                                                                                                                                                                                                                                                                                                                                                                                                                                                                                                                                                                                                                                                                                                                                                                                                                                                                                                                                                                                                                                                                                                                                                                                                                                                | <b>211</b> |
| S6            | S4 OR S5                                                                                                                                                                                                                                                                                                                                                                                                                                                                                                                                                                                                                                                                                                                                                                                                                                                                                                                                                                                                                                                                                                                                                                                                                                                                                                                                                                                                                                                                                                                                                                                                                                                                                                                                                                                                                                                                                                                                                                                                                                                                                                                                                                                                                                                                                                                                                                                                                                                                                                                                                                                                                                                                                                                                                                                                                                                                                                                                                                                                                                                                                                 | 114,099    |
| S5            | (MH "Fatty Liver") OR (MH "Nonalcoholic Fatty Liver Disease") OR (MH "Fibrosis") OR (MH "Insulin Resistance+") OR (MH "Glucose Clamp Technique")                                                                                                                                                                                                                                                                                                                                                                                                                                                                                                                                                                                                                                                                                                                                                                                                                                                                                                                                                                                                                                                                                                                                                                                                                                                                                                                                                                                                                                                                                                                                                                                                                                                                                                                                                                                                                                                                                                                                                                                                                                                                                                                                                                                                                                                                                                                                                                                                                                                                                                                                                                                                                                                                                                                                                                                                                                                                                                                                                         | 46,144     |
| S4            | TI ( "fatty liver*" OR "NAFLD" OR "NAFL" OR "MAFLD" OR "MAFL" OR "hepatic triglycerides content" OR "steatosis" OR "liver fat" OR "hepatic fat" OR "hepatic lipid" OR ("fatty infiltration" AND (liver OR hepatic)) OR "liver disease*" OR "bright liver" OR "intrahepatocellular lipid" OR "intrahepatocellular fat" OR "ectopic fat" OR "ectopic lipid" OR "steatohepatitis" OR "steato-hepatitis" OR "NASH" OR "liver stiffness" OR "LSM" OR "fibrosis" OR "Insulin resistanc*" OR "insulin sensitivity" OR "insulin insensitivity" OR "insulin intolerance" OR "homeostasis model assessment" OR "HOMA IR" OR "HOMA index" OR "QUICKI" OR "euglycemic clamp" OR "euglycemic glucose clamp" OR "euglycemic-hyperinsulinemic clamp" OR "hyperinsulinemic-euglycemic glucose clamp" OR ("minimal model*" AND (IVGTT OR "intravenous glucose tolerance test"))) OR "metabolic syndrome*" OR "MetS" OR "syndrome x" OR "reaven syndrome*" OR "reaven's syndrome" OR "cardiometabolic syndrome*" OR "cardio-metabolic syndrome*" ) OR AB ( "fatty liver*" OR "NAFLD" OR "NAFL" OR "MAFLD" OR "MAFL" OR "hepatic triglycerides content" OR "steatosis" OR "liver fat" OR "hepatic fat" OR "hepatic lipid" OR ("fatty infiltration" AND (liver OR hepatic)) OR "liver disease*" OR "bright liver" OR "intrahepatocellular lipid" OR "intrahepatocellular fat" OR "ectopic fat" OR "ectopic lipid" OR "steatohepatitis" OR "steato-hepatitis" OR "NASH" OR "liver stiffness" OR "LSM" OR "fibrosis" OR "Insulin resistanc*" OR "insulin sensitivity" OR "insulin insensitivity" OR "insulin intolerance" OR "homeostasis model assessment" OR "HOMA IR" OR "HOMA index" OR "QUICKI" OR "euglycemic clamp" OR "euglycemic glucose clamp" OR "euglycemic-hyperinsulinemic clamp" OR "hyperinsulinemic-euglycemic glucose clamp" OR ("minimal model*" AND (IVGTT OR "intravenous glucose tolerance test"))) OR "metabolic syndrome*" OR "MetS" OR "syndrome x" OR "reaven syndrome*" OR "reaven's syndrome" OR "cardiometabolic syndrome*" OR "cardio-metabolic syndrome*" ) OR SU ( "fatty liver*" OR "NAFLD" OR "NAFL" OR "MAFLD" OR "MAFL" OR "hepatic triglycerides content" OR "steatosis" OR "liver fat" OR "hepatic fat" OR "hepatic lipid" OR ("fatty infiltration" AND (liver OR hepatic)) OR "liver disease*" OR "bright liver" OR "intrahepatocellular lipid" OR "intrahepatocellular fat" OR "ectopic fat" OR "ectopic lipid" OR "steatohepatitis" OR "steato-hepatitis" OR "NASH" OR "liver stiffness" OR "LSM" OR "fibrosis" OR "Insulin resistanc*" OR "insulin sensitivity" OR "insulin insensitivity" OR "insulin intolerance" OR "homeostasis model assessment" OR "HOMA IR" OR "HOMA index" OR "QUICKI" OR "euglycemic clamp" OR "euglycemic glucose clamp" OR "euglycemic-hyperinsulinemic clamp" OR "hyperinsulinemic-euglycemic glucose clamp" OR ("minimal model*" AND (IVGTT OR "intravenous glucose tolerance test"))) OR "metabolic syndrome*" OR "MetS" OR "syndrome x" OR "reaven syndrome*" OR "reaven's syndrome" OR "cardiometabolic syndrome*" OR "cardio-metabolic syndrome*" ) | 113,693    |
| S3            | S1 OR S2                                                                                                                                                                                                                                                                                                                                                                                                                                                                                                                                                                                                                                                                                                                                                                                                                                                                                                                                                                                                                                                                                                                                                                                                                                                                                                                                                                                                                                                                                                                                                                                                                                                                                                                                                                                                                                                                                                                                                                                                                                                                                                                                                                                                                                                                                                                                                                                                                                                                                                                                                                                                                                                                                                                                                                                                                                                                                                                                                                                                                                                                                                 | 7,286      |
| S2            | (MH "Food, Commercially Packaged") OR (MH "Fast Foods")                                                                                                                                                                                                                                                                                                                                                                                                                                                                                                                                                                                                                                                                                                                                                                                                                                                                                                                                                                                                                                                                                                                                                                                                                                                                                                                                                                                                                                                                                                                                                                                                                                                                                                                                                                                                                                                                                                                                                                                                                                                                                                                                                                                                                                                                                                                                                                                                                                                                                                                                                                                                                                                                                                                                                                                                                                                                                                                                                                                                                                                  | 2,143      |



| search ID#      | Search Terms                                                                                                                                                                                                                                                                                                                                                                                                                                                                                                                                                                                                                                                                                                                                                                                                                                                                                                                                                                                                                                                                                                                                                                                                                                                                                                                                                                                                                                                                                                                                                                                                                                          | Results   |
|-----------------|-------------------------------------------------------------------------------------------------------------------------------------------------------------------------------------------------------------------------------------------------------------------------------------------------------------------------------------------------------------------------------------------------------------------------------------------------------------------------------------------------------------------------------------------------------------------------------------------------------------------------------------------------------------------------------------------------------------------------------------------------------------------------------------------------------------------------------------------------------------------------------------------------------------------------------------------------------------------------------------------------------------------------------------------------------------------------------------------------------------------------------------------------------------------------------------------------------------------------------------------------------------------------------------------------------------------------------------------------------------------------------------------------------------------------------------------------------------------------------------------------------------------------------------------------------------------------------------------------------------------------------------------------------|-----------|
| S1              | TI ( "ultra-processed" OR "UPF" OR "UPFs" OR "ultraprocessed" OR "highly processed" OR "processed food*" OR "processed meal*" OR "processed product*" OR "fast food*" OR "fastfood*" OR "junk food*" OR "ready-to-eat" OR "RTE food*" OR "prepared food*" OR "prepared meal*" OR "ready cooked food*" OR "ready cooked meal*" OR "ready made food*" OR "ready made meal*" OR "convenience food*" OR "convenience meal*" OR "industrialized food*" OR "industrialized meal*" OR "Industrially prepared food*" OR "Industrially prepared meal*" ) OR AB ( "ultra-processed" OR "UPF" OR "UPFs" OR "ultraprocessed" OR "highly processed" OR "processed food*" OR "processed meal*" OR "processed product*" OR "fast food*" OR "fastfood*" OR "junk food*" OR "ready-to-eat" OR "RTE food*" OR "prepared food*" OR "prepared meal*" OR "ready cooked food*" OR "ready cooked meal*" OR "ready made food*" OR "ready made meal*" OR "convenience food*" OR "convenience meal*" OR "industrialized food*" OR "industrialized meal*" OR "Industrially prepared food*" OR "Industrially prepared meal*" ) OR SU ( "ultra-processed" OR "UPF" OR "UPFs" OR "ultraprocessed" OR "highly processed" OR "processed food*" OR "processed meal*" OR "processed product*" OR "fast food*" OR "fastfood*" OR "junk food*" OR "ready-to-eat" OR "RTE food*" OR "prepared food*" OR "prepared meal*" OR "ready cooked food*" OR "ready cooked meal*" OR "ready made food*" OR "ready made meal*" OR "convenience food*" OR "convenience meal*" OR "industrialized food*" OR "industrialized meal*" OR "Industrially prepared food*" OR "Industrially prepared meal*" ) | 7,031     |
| <b>Cochrane</b> |                                                                                                                                                                                                                                                                                                                                                                                                                                                                                                                                                                                                                                                                                                                                                                                                                                                                                                                                                                                                                                                                                                                                                                                                                                                                                                                                                                                                                                                                                                                                                                                                                                                       |           |
| S15             | #14 AND #5                                                                                                                                                                                                                                                                                                                                                                                                                                                                                                                                                                                                                                                                                                                                                                                                                                                                                                                                                                                                                                                                                                                                                                                                                                                                                                                                                                                                                                                                                                                                                                                                                                            | <b>69</b> |
| S14             | #12 OR #13                                                                                                                                                                                                                                                                                                                                                                                                                                                                                                                                                                                                                                                                                                                                                                                                                                                                                                                                                                                                                                                                                                                                                                                                                                                                                                                                                                                                                                                                                                                                                                                                                                            | 49262     |
| S13             | ("fatty liver*" OR "NAFLD" OR "NAFL" OR "MAFLD" OR "MAFL" OR "hepatic triglycerides content" OR "steatosis" OR "liver fat" OR "hepatic fat" OR "hepatic lipid" OR ("fatty infiltration" AND (liver OR hepatic)) OR "liver disease*" OR "bright liver" OR "intrahepatocellular lipid" OR "intrahepatocellular fat" OR "ectopic fat" OR "ectopic lipid" OR "steatohepatitis" OR "steato-hepatitis" OR "NASH" OR "liver stiffness" OR "LSM" OR "fibrosis" OR "Insulin resistanc*" OR "insulin sensitivity" OR "insulin insensitivity" OR "insulin intolerance" OR "homeostasis model assessment" OR "HOMA IR" OR "HOMA index" OR "QUICKI" OR "euglycemic clamp" OR "euglycemic glucose clamp" OR "euglycemic-hyperinsulinemic clamp" OR "hyperinsulinemic-euglycemic glucose clamp" OR ("minimal model*" AND (IVGTT OR "intravenous glucose tolerance test"))) OR "metabolic syndrome*" OR "MetS" OR "syndrome x" OR "reaven syndrome*" OR "reaven's syndrome" OR "cardiometabolic syndrome*" OR "cardio-metabolic syndrome*"):ti,ab,kw                                                                                                                                                                                                                                                                                                                                                                                                                                                                                                                                                                                                                  | 47319     |
| S12             | #6 OR #7 OR #8 OR #9 OR #10 OR #11                                                                                                                                                                                                                                                                                                                                                                                                                                                                                                                                                                                                                                                                                                                                                                                                                                                                                                                                                                                                                                                                                                                                                                                                                                                                                                                                                                                                                                                                                                                                                                                                                    | 11931     |
| S11             | MeSH descriptor: [Glucose Clamp Technique] this term only                                                                                                                                                                                                                                                                                                                                                                                                                                                                                                                                                                                                                                                                                                                                                                                                                                                                                                                                                                                                                                                                                                                                                                                                                                                                                                                                                                                                                                                                                                                                                                                             | 1037      |
| S10             | MeSH descriptor: [Metabolic Syndrome] this term only                                                                                                                                                                                                                                                                                                                                                                                                                                                                                                                                                                                                                                                                                                                                                                                                                                                                                                                                                                                                                                                                                                                                                                                                                                                                                                                                                                                                                                                                                                                                                                                                  | 2391      |
| S9              | MeSH descriptor: [Insulin Resistance] this term only                                                                                                                                                                                                                                                                                                                                                                                                                                                                                                                                                                                                                                                                                                                                                                                                                                                                                                                                                                                                                                                                                                                                                                                                                                                                                                                                                                                                                                                                                                                                                                                                  | 5834      |
| S8              | MeSH descriptor: [Fibrosis] this term only                                                                                                                                                                                                                                                                                                                                                                                                                                                                                                                                                                                                                                                                                                                                                                                                                                                                                                                                                                                                                                                                                                                                                                                                                                                                                                                                                                                                                                                                                                                                                                                                            | 1898      |
| S7              | MeSH descriptor: [Non-alcoholic Fatty Liver Disease] this term only                                                                                                                                                                                                                                                                                                                                                                                                                                                                                                                                                                                                                                                                                                                                                                                                                                                                                                                                                                                                                                                                                                                                                                                                                                                                                                                                                                                                                                                                                                                                                                                   | 1532      |
| S6              | MeSH descriptor: [Fatty Liver] this term only                                                                                                                                                                                                                                                                                                                                                                                                                                                                                                                                                                                                                                                                                                                                                                                                                                                                                                                                                                                                                                                                                                                                                                                                                                                                                                                                                                                                                                                                                                                                                                                                         | 1114      |
| S5              | #3 OR #4                                                                                                                                                                                                                                                                                                                                                                                                                                                                                                                                                                                                                                                                                                                                                                                                                                                                                                                                                                                                                                                                                                                                                                                                                                                                                                                                                                                                                                                                                                                                                                                                                                              | 1188      |
| S4              | ("ultra-processed" OR "UPF" OR "UPFs" OR "ultraprocessed" OR "highly processed" OR "processed food*" OR "processed meal*" OR "processed product*" OR "fast food*" OR "fastfood*" OR "junk food*" OR "ready-to-eat" OR "RTE food*" OR "prepared food*" OR "prepared meal*" OR "ready cooked food*" OR "ready cooked meal*" OR "ready made food*" OR "ready made meal*" OR "convenience food*" OR "convenience meal*" OR "industrialized food*" OR "industrialized meal*" OR "Industrially prepared food*" OR "Industrially prepared meal*"):ti,ab,kw                                                                                                                                                                                                                                                                                                                                                                                                                                                                                                                                                                                                                                                                                                                                                                                                                                                                                                                                                                                                                                                                                                   | 1117      |
| S3              | #1 OR #2                                                                                                                                                                                                                                                                                                                                                                                                                                                                                                                                                                                                                                                                                                                                                                                                                                                                                                                                                                                                                                                                                                                                                                                                                                                                                                                                                                                                                                                                                                                                                                                                                                              | 158       |

| search ID#    | Search Terms                                                                                                                                                                                                                                                                                                                                                                                                                                                                                                                                                                                                                                                                                                                                                                                                                                                                                                                                                                                                                                                                                                                                                                                                                                                                                                                                                                                                                                                  | Results     |
|---------------|---------------------------------------------------------------------------------------------------------------------------------------------------------------------------------------------------------------------------------------------------------------------------------------------------------------------------------------------------------------------------------------------------------------------------------------------------------------------------------------------------------------------------------------------------------------------------------------------------------------------------------------------------------------------------------------------------------------------------------------------------------------------------------------------------------------------------------------------------------------------------------------------------------------------------------------------------------------------------------------------------------------------------------------------------------------------------------------------------------------------------------------------------------------------------------------------------------------------------------------------------------------------------------------------------------------------------------------------------------------------------------------------------------------------------------------------------------------|-------------|
| S2            | MeSH descriptor: [Fast Foods] this term only                                                                                                                                                                                                                                                                                                                                                                                                                                                                                                                                                                                                                                                                                                                                                                                                                                                                                                                                                                                                                                                                                                                                                                                                                                                                                                                                                                                                                  | 157         |
| S1            | MeSH descriptor: [Food, Processed] this term only                                                                                                                                                                                                                                                                                                                                                                                                                                                                                                                                                                                                                                                                                                                                                                                                                                                                                                                                                                                                                                                                                                                                                                                                                                                                                                                                                                                                             | 2           |
| <b>Embase</b> |                                                                                                                                                                                                                                                                                                                                                                                                                                                                                                                                                                                                                                                                                                                                                                                                                                                                                                                                                                                                                                                                                                                                                                                                                                                                                                                                                                                                                                                               |             |
| S7            | S5 AND S6                                                                                                                                                                                                                                                                                                                                                                                                                                                                                                                                                                                                                                                                                                                                                                                                                                                                                                                                                                                                                                                                                                                                                                                                                                                                                                                                                                                                                                                     | <b>1221</b> |
| S6            | S3 OR S4                                                                                                                                                                                                                                                                                                                                                                                                                                                                                                                                                                                                                                                                                                                                                                                                                                                                                                                                                                                                                                                                                                                                                                                                                                                                                                                                                                                                                                                      | 873909      |
| S5            | S1 OR S2                                                                                                                                                                                                                                                                                                                                                                                                                                                                                                                                                                                                                                                                                                                                                                                                                                                                                                                                                                                                                                                                                                                                                                                                                                                                                                                                                                                                                                                      | 26262       |
| S4            | 'fatty liver'/de OR 'metabolic fatty liver'/de OR 'nonalcoholic fatty liver'/de OR 'steatohepatitis'/de OR 'nonalcoholic steatohepatitis'/de OR 'liver fibrosis'/de OR 'insulin resistance'/de OR 'insulin sensitivity'/de OR 'homeostasis model assessment'/de OR 'homa index'/de OR 'quantitative insulin sensitivity check index'/de OR 'hyperinsulinemic-euglycemic clamp technique'/de OR 'metabolic syndrome x'/de                                                                                                                                                                                                                                                                                                                                                                                                                                                                                                                                                                                                                                                                                                                                                                                                                                                                                                                                                                                                                                      | 376639      |
| S3            | fatty liver*:ti,ab,kw OR 'nafld':ti,ab,kw OR 'nafl':ti,ab,kw OR 'mafld':ti,ab,kw OR 'mafl':ti,ab,kw OR 'hepatic triglycerides content':ti,ab,kw OR 'steatosis':ti,ab,kw OR 'liver fat':ti,ab,kw OR 'hepatic fat':ti,ab,kw OR 'hepatic lipid':ti,ab,kw OR ('fatty infiltration':ti,ab,kw AND (liver:ti,ab,kw OR hepatic:ti,ab,kw)) OR 'liver disease*':ti,ab,kw OR 'bright liver':ti,ab,kw OR 'intrahepatocellular lipid':ti,ab,kw OR 'intrahepatocellular fat':ti,ab,kw OR 'ectopic fat':ti,ab,kw OR 'ectopic lipid':ti,ab,kw OR 'steatohepatitis':ti,ab,kw OR 'steato-hepatitis':ti,ab,kw OR 'nash':ti,ab,kw OR 'liver stiffness':ti,ab,kw OR 'lsm':ti,ab,kw OR 'fibrosis':ti,ab,kw OR 'insulin resistan*':ti,ab,kw OR 'insulin sensitivity':ti,ab,kw OR 'insulin insensitivity':ti,ab,kw OR 'insulin intolerance':ti,ab,kw OR 'homeostasis model assessment':ti,ab,kw OR 'homa ir':ti,ab,kw OR 'homa index':ti,ab,kw OR 'quick'i':ti,ab,kw OR 'euglycemic clamp':ti,ab,kw OR 'euglycemic glucose clamp':ti,ab,kw OR 'euglycemic-hyperinsulinemic clamp':ti,ab,kw OR 'hyperinsulinemic-euglycemic glucose clamp':ti,ab,kw OR ('minimal model*':ti,ab,kw AND (ivgtt:ti,ab,kw OR 'intravenous glucose tolerance test':ti,ab,kw)) OR 'metabolic syndrome*':ti,ab,kw OR 'mets':ti,ab,kw OR 'syndrome x':ti,ab,kw OR 'reaven syndrome*':ti,ab,kw OR 'reaven/s syndrome':ti,ab,kw OR 'cardiometabolic syndrome*':ti,ab,kw OR 'cardio-metabolic syndrome*':ti,ab,kw | 802678      |
| S2            | 'ultra-processed food'/de OR 'processed food'/de OR 'convenience food'/de OR 'fast food'/de OR 'junk food'/de                                                                                                                                                                                                                                                                                                                                                                                                                                                                                                                                                                                                                                                                                                                                                                                                                                                                                                                                                                                                                                                                                                                                                                                                                                                                                                                                                 | 12714       |
| S1            | 'ultra-processed':ti,ab,kw OR 'upf':ti,ab,kw OR 'upfs':ti,ab,kw OR 'ultraprocessed':ti,ab,kw OR 'highly processed':ti,ab,kw OR 'processed food*':ti,ab,kw OR 'processed meal*':ti,ab,kw OR 'processed product*':ti,ab,kw OR 'fast food*':ti,ab,kw OR 'fastfood*':ti,ab,kw OR 'junk food*':ti,ab,kw OR 'ready-to-eat':ti,ab,kw OR 'rte food*':ti,ab,kw OR 'prepared food*':ti,ab,kw OR 'prepared meal*':ti,ab,kw OR 'ready cooked food*':ti,ab,kw OR 'ready cooked meal*':ti,ab,kw OR 'ready made food*':ti,ab,kw OR 'ready made meal*':ti,ab,kw OR 'convenience food*':ti,ab,kw OR 'convenience meal*':ti,ab,kw OR 'industrialized food*':ti,ab,kw OR 'industrialized meal*':ti,ab,kw OR 'industrially prepared food*':ti,ab,kw OR 'industrially prepared meal*':ti,ab,kw                                                                                                                                                                                                                                                                                                                                                                                                                                                                                                                                                                                                                                                                                     | 20432       |
| <b>PubMed</b> |                                                                                                                                                                                                                                                                                                                                                                                                                                                                                                                                                                                                                                                                                                                                                                                                                                                                                                                                                                                                                                                                                                                                                                                                                                                                                                                                                                                                                                                               |             |
| S7            | #5 AND #6                                                                                                                                                                                                                                                                                                                                                                                                                                                                                                                                                                                                                                                                                                                                                                                                                                                                                                                                                                                                                                                                                                                                                                                                                                                                                                                                                                                                                                                     | <b>540</b>  |
| S6            | #2 OR #4                                                                                                                                                                                                                                                                                                                                                                                                                                                                                                                                                                                                                                                                                                                                                                                                                                                                                                                                                                                                                                                                                                                                                                                                                                                                                                                                                                                                                                                      | 550,544     |
| S5            | #1 OR #3                                                                                                                                                                                                                                                                                                                                                                                                                                                                                                                                                                                                                                                                                                                                                                                                                                                                                                                                                                                                                                                                                                                                                                                                                                                                                                                                                                                                                                                      | 17,305      |
| S4            | (((((("Fatty Liver"[Mesh:NoExp]) OR "Non-alcoholic Fatty Liver Disease"[Mesh:NoExp]) OR "Fibrosis"[Mesh:NoExp]) OR "Insulin Resistance"[Mesh:NoExp]) OR "Metabolic Syndrome"[Mesh:NoExp]) OR "Glucose Clamp Technique"[Mesh:NoExp]                                                                                                                                                                                                                                                                                                                                                                                                                                                                                                                                                                                                                                                                                                                                                                                                                                                                                                                                                                                                                                                                                                                                                                                                                            | 174,459     |

| search ID#    | Search Terms                                                                                                                                                                                                                                                                                                                                                                                                                                                                                                                                                                                                                                                                                                                                                                                                                                                                                                                                                                                                                                                                                                                                                                                                                                                                                                                                                                                                                                                                                                                                                                                                                                                                                                                                                                                    | Results      |
|---------------|-------------------------------------------------------------------------------------------------------------------------------------------------------------------------------------------------------------------------------------------------------------------------------------------------------------------------------------------------------------------------------------------------------------------------------------------------------------------------------------------------------------------------------------------------------------------------------------------------------------------------------------------------------------------------------------------------------------------------------------------------------------------------------------------------------------------------------------------------------------------------------------------------------------------------------------------------------------------------------------------------------------------------------------------------------------------------------------------------------------------------------------------------------------------------------------------------------------------------------------------------------------------------------------------------------------------------------------------------------------------------------------------------------------------------------------------------------------------------------------------------------------------------------------------------------------------------------------------------------------------------------------------------------------------------------------------------------------------------------------------------------------------------------------------------|--------------|
| S3            | ("Food, Processed"[Mesh:NoExp]) OR "Fast Foods"[Mesh:NoExp]                                                                                                                                                                                                                                                                                                                                                                                                                                                                                                                                                                                                                                                                                                                                                                                                                                                                                                                                                                                                                                                                                                                                                                                                                                                                                                                                                                                                                                                                                                                                                                                                                                                                                                                                     | 3,037        |
| S2            | "fatty liver"[Title/Abstract] OR "NAFLD"[Title/Abstract] OR "NAFL"[Title/Abstract] OR "MAFLD"[Title/Abstract] OR "MAFL"[Title/Abstract] OR "hepatic triglycerides content"[Title/Abstract] OR "steatosis"[Title/Abstract] OR "liver fat"[Title/Abstract] OR "hepatic fat"[Title/Abstract] OR "hepatic lipid"[Title/Abstract] OR ("fatty infiltration"[Title/Abstract] AND (liver[Title/Abstract] OR hepatic[Title/Abstract])) OR "liver disease"[Title/Abstract] OR "bright liver"[Title/Abstract] OR "intrahepatocellular lipid"[Title/Abstract] OR "intrahepatocellular fat"[Title/Abstract] OR "ectopic fat"[Title/Abstract] OR "ectopic lipid"[Title/Abstract] OR "steatohepatitis"[Title/Abstract] OR "steato-hepatitis"[Title/Abstract] OR "NASH"[Title/Abstract] OR "liver stiffness"[Title/Abstract] OR "LSM"[Title/Abstract] OR "fibrosis"[Title/Abstract] OR "Insulin resistan"[Title/Abstract] OR "insulin sensitivity"[Title/Abstract] OR "insulin insensitivity"[Title/Abstract] OR "insulin intolerance"[Title/Abstract] OR "homeostasis model assessment"[Title/Abstract] OR "HOMA IR"[Title/Abstract] OR "HOMA index"[Title/Abstract] OR "QUICKI"[Title/Abstract] OR "euglycemic clamp"[Title/Abstract] OR "euglycemic glucose clamp"[Title/Abstract] OR "euglycemic-hyperinsulinemic clamp"[Title/Abstract] OR "hyperinsulinemic-euglycemic glucose clamp"[Title/Abstract] OR ("minimal model"[Title/Abstract] AND (IVGTT[Title/Abstract] OR "intravenous glucose tolerance test"[Title/Abstract])) OR "metabolic syndrome"[Title/Abstract] OR "MetS"[Title/Abstract] OR "syndrome x"[Title/Abstract] OR "reaven syndrome"[Title/Abstract] OR "reaven's syndrome"[Title/Abstract] OR "cardiometabolic syndrome"[Title/Abstract] OR "cardio-metabolic syndrome"[Title/Abstract] | 525,309      |
| S1            | "ultra-processed"[Title/Abstract] OR "UPF"[Title/Abstract] OR "UPFs"[Title/Abstract] OR "ultraprocessed"[Title/Abstract] OR "highly processed"[Title/Abstract] OR "processed food"[Title/Abstract] OR "processed meal"[Title/Abstract] OR "processed product"[Title/Abstract] OR "fast food"[Title/Abstract] OR "fastfood"[Title/Abstract] OR "junk food"[Title/Abstract] OR "ready-to-eat"[Title/Abstract] OR "RTE food"[Title/Abstract] OR "prepared food"[Title/Abstract] OR "prepared meal"[Title/Abstract] OR "ready cooked food"[Title/Abstract] OR "ready cooked meal"[Title/Abstract] OR "ready made food"[Title/Abstract] OR "ready made meal"[Title/Abstract] OR "convenience food"[Title/Abstract] OR "convenience meal"[Title/Abstract] OR "industrialized food"[Title/Abstract] OR "industrialized meal"[Title/Abstract] OR "Industrially prepared food"[Title/Abstract] OR "Industrially prepared meal"[Title/Abstract]                                                                                                                                                                                                                                                                                                                                                                                                                                                                                                                                                                                                                                                                                                                                                                                                                                                           | 16,587       |
| <b>Scopus</b> |                                                                                                                                                                                                                                                                                                                                                                                                                                                                                                                                                                                                                                                                                                                                                                                                                                                                                                                                                                                                                                                                                                                                                                                                                                                                                                                                                                                                                                                                                                                                                                                                                                                                                                                                                                                                 |              |
| S3            | S1 AND S2                                                                                                                                                                                                                                                                                                                                                                                                                                                                                                                                                                                                                                                                                                                                                                                                                                                                                                                                                                                                                                                                                                                                                                                                                                                                                                                                                                                                                                                                                                                                                                                                                                                                                                                                                                                       | <b>1,019</b> |
| S2            | ( TITLE-ABS-KEY ( "fatty liver" OR "nafld" OR "nafl" OR "mafld" OR "mafl" OR "hepatic triglycerides content" OR "steatosis" OR "liver fat" OR "hepatic fat" OR "hepatic lipid" OR ( "fatty infiltration" AND ( liver OR hepatic ) ) OR "liver disease" ) OR TITLE-ABS-KEY ( "bright liver" OR "intrahepatocellular lipid" OR "intrahepatocellular fat" OR "ectopic fat" OR "ectopic lipid" OR "steatohepatitis" OR "steato-hepatitis" OR "nash" OR "liver stiffness" OR "lsm" OR "fibrosis" ) OR TITLE-ABS-KEY ( "insulin resistan" OR "insulin sensitivity" OR "insulin insensitivity" OR "insulin intolerance" OR "homeostasis model assessment" OR "homa ir" OR "homa index" OR "quickl" OR "euglycemic clamp" OR "euglycemic glucose clamp" OR "euglycemic-hyperinsulinemic clamp" OR "hyperinsulinemic-euglycemic glucose clamp" ) OR TITLE-ABS-KEY ( ( "minimal model" AND ( ivgtt OR "intravenous glucose tolerance test" ) ) OR "metabolic syndrome" OR "mets" OR "syndrome x" OR "reaven syndrome" OR "reaven's syndrome" OR "cardiometabolic syndrome" OR "cardio-metabolic syndrome" ) ) )                                                                                                                                                                                                                                                                                                                                                                                                                                                                                                                                                                                                                                                                                           | 878,126      |
| S1            | ( TITLE-ABS-KEY ( "ultra-processed" OR "upf" OR "upfs" OR "ultraprocessed" OR "highly processed" OR "processed food" OR "processed meal" OR "processed product" OR "fast food" ) OR TITLE-ABS-KEY ( "fastfood" OR "junk food" OR "ready-to-eat" OR "rte food" OR "prepared food" OR "prepared meal" OR "ready cooked food" ) OR TITLE-ABS-KEY ( "ready cooked meal" OR "ready made food" OR "ready made meal" OR "convenience food" OR "convenience meal" OR "industrialized food" OR "industrialized meal" OR "industrially prepared food" OR "industrially prepared meal" ) )                                                                                                                                                                                                                                                                                                                                                                                                                                                                                                                                                                                                                                                                                                                                                                                                                                                                                                                                                                                                                                                                                                                                                                                                                 | 41,849       |

| search ID#            | Search Terms                                                                                                                                                                                                                                                                                                                                                                                                                                                                                                                                                                                                                                                                                                                                                                                                                                                                                                                                                                                                                                                                                                                                                                                                                                                                                                                                                                                                                                                                                                                                                                                 | Results    |
|-----------------------|----------------------------------------------------------------------------------------------------------------------------------------------------------------------------------------------------------------------------------------------------------------------------------------------------------------------------------------------------------------------------------------------------------------------------------------------------------------------------------------------------------------------------------------------------------------------------------------------------------------------------------------------------------------------------------------------------------------------------------------------------------------------------------------------------------------------------------------------------------------------------------------------------------------------------------------------------------------------------------------------------------------------------------------------------------------------------------------------------------------------------------------------------------------------------------------------------------------------------------------------------------------------------------------------------------------------------------------------------------------------------------------------------------------------------------------------------------------------------------------------------------------------------------------------------------------------------------------------|------------|
| <b>Web of science</b> |                                                                                                                                                                                                                                                                                                                                                                                                                                                                                                                                                                                                                                                                                                                                                                                                                                                                                                                                                                                                                                                                                                                                                                                                                                                                                                                                                                                                                                                                                                                                                                                              |            |
| S1                    | <p>"ultra-processed" OR "UPF" OR "UPFs" OR "ultraprocessed" OR "highly processed" OR "processed food*" OR "processed meal*" OR "processed product*" OR "fast food*" OR "fastfood*" OR "junk food*" OR "ready-to-eat" OR "RTE food*" OR "prepared food*" OR "prepared meal*" OR "ready cooked food*" OR "ready cooked meal*" OR "ready made food*" OR "ready made meal*" OR "convenience food*" OR "convenience meal*" OR "industrialized food*" OR "industrialized meal*" OR "Industrially prepared food*" OR "Industrially prepared meal*" (Topic) AND "fatty liver*" OR "NAFLD" OR "NAFL" OR "MAFLD" OR "MAFL" OR "hepatic triglycerides content" OR "steatosis" OR "liver fat" OR "hepatic fat" OR "hepatic lipid" OR ("fatty infiltration" AND (liver OR hepatic)) OR "liver disease*" OR "bright liver" OR "intrahepatocellular lipid" OR "intrahepatocellular fat" OR "ectopic fat" OR "ectopic lipid" OR "steatohepatitis" OR "steato-hepatitis" OR "NASH" OR "liver stiffness" OR "LSM" OR "fibrosis" OR "Insulin resistanc*" OR "insulin sensitivity" OR "insulin insensitivity" OR "insulin intolerance" OR "homeostasis model assessment" OR "HOMA IR" OR "HOMA index" OR "QUICKI" OR "euglycemic clamp" OR "euglycemic glucose clamp" OR "euglycemic-hyperinsulinemic clamp" OR "hyperinsulinemic-euglycemic glucose clamp" OR ("minimal model*" AND (IVGTT OR "intravenous glucose tolerance test")) OR "metabolic syndrome*" OR "MetS" OR "syndrome x" OR "reaven syndrome*" OR "reaven's syndrome" OR "cardiometabolic syndrome*" OR "cardio-metabolic syndrome*" (Topic)</p> | <b>916</b> |

## **keyword search strategy**

*PubMed; Cochrane; CINAHL; EMBASE; Web of Science; Scopus*

### **Concept #1**

*“ultra-processed” OR “UPF” OR “UPFs” OR “ultraprocessed” OR “highly processed” OR “processed food\*” OR “processed meal\*” OR “processed product\*” OR “fast food\*” OR “fastfood\*” OR “junk food\*” OR “ready-to-eat” OR “RTE food\*” OR “prepared food\*” OR “prepared meal\*” OR “ready cooked food\*” OR “ready cooked meal\*” OR “ready made food\*” OR “ready made meal\*” OR “convenience food\*” OR “convenience meal\*” OR “industrialized food\*” OR “industrialized meal\*” OR “Industrially prepared food\*” OR “Industrially prepared meal\*”*

## **AND**

### **Concept #2**

*“fatty liver\*” OR “NAFLD” OR “NAFL” OR “MAFLD” OR “MAFL” OR “hepatic triglycerides content” OR “steatosis” OR “liver fat” OR “hepatic fat” OR “hepatic lipid” OR (“fatty infiltration” AND (liver OR hepatic)) OR “liver disease\*” OR “bright liver” OR “intrahepatocellular lipid” OR “intrahepatocellular fat” OR “ectopic fat” OR “ectopic lipid” OR “steatohepatitis” OR “steato-hepatitis” OR “NASH” OR “liver stiffness” OR “LSM” OR “fibrosis” OR “Insulin resistanc\*” OR “insulin sensitivity” OR “insulin insensitivity” OR “insulin intolerance” OR “homeostasis model assessment” OR “HOMA IR” OR “HOMA index” OR “QUICKI” OR “euglycemic clamp” OR “euglycemic glucose clamp” OR “euglycemic-hyperinsulinemic clamp” OR “hyperinsulinemic-euglycemic glucose clamp” OR (“minimal model\*” AND (IVGTT OR “intravenous glucose tolerance test”)) OR “metabolic syndrome\*” OR “MetS” OR “syndrome x” OR “reaven syndrome\*” OR “reaven’s syndrome” OR “cardiometabolic syndrome\*” OR “cardio-metabolic syndrome\*”*

**Table S3. Controlled vocabulary thesauruses for relevant databases**

| PubMed \Cochrane<br>MeSH Database                                                                                                                                                                                                                                                                           | CINAHL<br>CINAHL Subject Headings                                                                                                                                                                                                                                                                                                      | EMBASE<br>Emtree                                                                                                                                                                                                                                                                                                                                                                                                                                                                                                                                                                                                                                                                                           |
|-------------------------------------------------------------------------------------------------------------------------------------------------------------------------------------------------------------------------------------------------------------------------------------------------------------|----------------------------------------------------------------------------------------------------------------------------------------------------------------------------------------------------------------------------------------------------------------------------------------------------------------------------------------|------------------------------------------------------------------------------------------------------------------------------------------------------------------------------------------------------------------------------------------------------------------------------------------------------------------------------------------------------------------------------------------------------------------------------------------------------------------------------------------------------------------------------------------------------------------------------------------------------------------------------------------------------------------------------------------------------------|
| <p><b>Concept #1</b><br/>Food, Processed (MeSH)<br/>Fast Foods (MeSH)</p> <p><b>AND</b></p> <p><b>Concept #2</b><br/>Fatty Liver (MeSH)<br/>Non-alcoholic Fatty Liver Disease (MeSH)<br/>Fibrosis (MeSH)<br/>Insulin Resistance (MeSH)<br/>Metabolic Syndrome (MeSH)<br/>Glucose Clamp Technique (MeSH)</p> | <p><b>Concept #1</b><br/>Food, Commercially Packaged (Index Term)<br/>Fast Foods (Index Term)</p> <p><b>AND</b></p> <p><b>Concept #2</b><br/>Fatty Liver (Index Term)<br/>Nonalcoholic Fatty Liver Disease (Index Term)<br/>Fibrosis (Index Term)<br/>Insulin Resistance (Index Term exp)<br/>Glucose Clamp Technique (Index Term)</p> | <p><b>Concept #1</b><br/>Ultra-processed food (EMTREE)<br/>Processed food (EMTREE)<br/>convenience food (EMTREE)<br/>fast food (EMTREE)<br/>junk food (EMTREE)</p> <p><b>AND</b></p> <p><b>Concept #2</b><br/>Fatty liver (EMTREE)<br/>Metabolic fatty liver (EMTREE)<br/>Nonalcoholic fatty liver (EMTREE)<br/>Steatohepatitis (EMTREE)<br/>Nonalcoholic steatohepatitis (EMTREE)<br/>Liver fibrosis (EMTREE)<br/>Insulin resistance (EMTREE)<br/>Insulin sensitivity (EMTREE)<br/>Homeostasis model assessment (EMTREE)<br/>HOMA index (EMTREE)<br/>Quantitative Insulin Sensitivity Check Index (EMTREE)<br/>Hyperinsulinemic-euglycemic clamp technique (EMTREE)<br/>Metabolic syndrome X (EMTREE)</p> |

## Excluded full text articles

**Table S4. Excluded full-text articles, including detailed reasons for their exclusion**

| Article, by first author (year) | Main reason for exclusion <sup>1</sup> |
|---------------------------------|----------------------------------------|
| Krupp K. (2020) (20)            | 2                                      |
| Kurniawan AL (2020) (21)        | 1                                      |
| Lee YQ. (2022) (22)             | 3                                      |
| Longo GZ. (2022) (23)           | 1                                      |
| Martinez-Perez C. (2021) (24)   | 3                                      |
| Migliaretti G. (2020) (25)      | 6                                      |
| Naja F. (2013) (26)             | 1                                      |
| Nakashita C. (2021) (27)        | 1                                      |
| Odegaard AO. (2022) (28)        | 2                                      |
| Kalafati IP. (2019) (29)        | 1                                      |
| Lopes-Pinto S. (2019) (30)      | 6                                      |
| Santana GJ. (2021) (31)         | 3                                      |
| Sayegh NF. (2022) (32)          | 1                                      |
| Talenezhad N. (2022) (33)       | 1                                      |
| Ushula TW. (2022) (34)          | 1                                      |
| Walker MS. (2022) (35)          | 5                                      |
| Yin X. (2020) (36)              | 1                                      |
| Zhang T. (2021) (37)            | 5                                      |
| Zhang ZF. (2021) (38)           | 3                                      |

| Article, by first author (year) | Main reason for exclusion <sup>1</sup> |
|---------------------------------|----------------------------------------|
| Azevedo VZ. (2021) (1)          | 2                                      |
| Barker K. (2021) (2)            | 4                                      |
| Choi YI. (2020) (3)             | 4                                      |
| Cloward J. (2022) (4)           | 4                                      |
| Dehghanseresht N. (2020) (5)    | 1                                      |
| Duval C. (2017) (6)             | 6                                      |
| Eslamian, G. (2017) (7)         | 4                                      |
| Fakhoury-Sayegh N. (2017) (8)   | 1                                      |
| Gadgil MD. (2015) (9)           | 1                                      |
| Giacomello L. (2023) (10)       | 6                                      |
| Griffin J. (2021) (11)          | 3                                      |
| Heidemann C. (2011) (12)        | 1                                      |
| Hosseini Z. (2021) (13)         | 1                                      |
| Hu E. (2022) (14)               | 4                                      |
| Johnson-Down L. (2015) (15)     | 1                                      |
| Juul F. (2021) (16)             | 3                                      |
| Kardashian A. (2022) (17)       | 2                                      |
| Kardashian A. (2023) (18)       | 2                                      |
| Konieczna J. (2021) (19)        | 5                                      |

<sup>1</sup>Main reasons for exclusion: (1) Unspecified classification - not based on processing level, n=15; (2) Did not assess UPF as a whole (only subgroups, as junk food or processed meat), n=5; (3) For MetS outcome - studies that did not assess MetS as a whole (only metabolic components separately or other cardiovascular risk indices), n=6; (4) Letters, editorials, meeting abstracts or reviews, n=5; (5) Inappropriate outcome (other), n=3; (6) Inappropriate exposure (other), n=4.

## Quality assessment

**Table S5.A. The Joanna Briggs Institute’s critical appraisal tool for included observational studies with NAFLD outcome (n=5)**

| Author (year)                      | Scoring Criteria |   |   |   |   |   |   |   |   |    |    |
|------------------------------------|------------------|---|---|---|---|---|---|---|---|----|----|
|                                    | 1                | 2 | 3 | 4 | 5 | 6 | 7 | 8 | 9 | 10 | 11 |
| <b>Prospective<sup>1</sup></b>     |                  |   |   |   |   |   |   |   |   |    |    |
| 1. Zhang S. (2022)                 | 1                | 1 | 1 | 1 | 1 | 1 | 1 | 1 | 1 | 1  | 1  |
| 2. Konieczna J. (2022)             | 1                | 1 | 1 | 1 | 1 | 0 | 0 | 1 | 1 | 1  | 1  |
| <b>Cross-sectional<sup>2</sup></b> |                  |   |   |   |   |   |   |   |   |    |    |
| 1. Liu Z. (2022)                   | 1                | 1 | 1 | 1 | 1 | 1 | 0 | 1 |   |    |    |
| 2. Friden M. (2022)                | 0                | 1 | 1 | 1 | 1 | 1 | 1 | 1 |   |    |    |
| 3. Ivancovsky-Wajcman D. (2021)    | 1                | 1 | 1 | 1 | 1 | 1 | 1 | 1 |   |    |    |

**Table S5.B. The Joanna Briggs Institute’s critical appraisal tool for included observational studies with IR and MetS outcomes (n=11)**

| Author (year)                  | Scoring Criteria |   |   |   |   |   |   |   |   |    |    |
|--------------------------------|------------------|---|---|---|---|---|---|---|---|----|----|
|                                | 1                | 2 | 3 | 4 | 5 | 6 | 7 | 8 | 9 | 10 | 11 |
| <b>Prospective<sup>1</sup></b> |                  |   |   |   |   |   |   |   |   |    |    |
| 1. Canhada SL. (2023)          | 1                | 1 | 1 | 1 | 1 | 1 | 1 | 1 | 1 | 1  | 1  |
| 2. Pan F. (2023)               | 1                | 1 | 1 | 1 | 1 | 1 | 1 | 1 | 1 | 1  | 1  |
| 3. Magalhães EIDS. (2022)      | 1                | 1 | 0 | 1 | 1 | 1 | 0 | 1 | 1 | 1  | 1  |



---

**Cross-sectional<sup>2</sup>**

|                                        |   |   |   |   |   |   |   |   |
|----------------------------------------|---|---|---|---|---|---|---|---|
| <b>1. Bezerra Barbosa L. (2023)</b>    | 1 | 1 | 1 | 1 | 1 | 1 | 0 | 1 |
| <b>2. Liu Z. (2022)</b>                | 1 | 1 | 1 | 1 | 1 | 1 | 1 | 1 |
| <b>3. Silva Meneguelli T. (2022)</b>   | 1 | 1 | 1 | 0 | 1 | 1 | 0 | 1 |
| <b>4. Hosseininasab D. (2022)</b>      | 0 | 1 | 1 | 1 | 1 | 1 | 1 | 0 |
| <b>5. Ivancovsky-Wajcman D. (2021)</b> | 1 | 1 | 1 | 1 | 1 | 1 | 1 | 1 |
| <b>6. Martinez Steele E. (2019)</b>    | 1 | 1 | 1 | 1 | 1 | 1 | 1 | 1 |
| <b>7. Lavigne-Robichaud M. (2018)</b>  | 1 | 1 | 1 | 1 | 1 | 1 | 1 | 1 |
| <b>8. Nasreddine L. (2018)</b>         | 1 | 1 | 0 | 1 | 1 | 1 | 1 | 1 |

---

<sup>1</sup>Joanna Briggs Institute (JBI) cohort studies critical appraisal tool. The scoring criteria were as follows: 1. Were the two groups similar and recruited from the same population? 2. Were the exposures measured similarly to assign people to both exposed and unexposed groups? 3. Was the exposure measured in a valid and reliable way? 4. Were confounding factors identified? 5. Were strategies to deal with confounding factors stated? 6. Were the groups/participants free of the outcome at the start of the study (or at the moment of exposure)? 7. Were the outcomes measured in a valid and reliable way? 8. Was the follow up time reported and sufficient to be long enough for outcomes to occur? 9. Was follow up complete, and if not, were the reasons to loss to follow up described and explored? 10. Were strategies to address incomplete follow up utilized? 11. Was appropriate statistical analysis used? yes: 1, no/ unclear/ not applicable: 0

<sup>2</sup>Joanna Briggs Institute (JBI) analytical cross sectional studies critical appraisal tool. The scoring criteria were as follows: 1. Were the criteria for inclusion in the sample clearly defined? 2. Were the study subjects and the setting described in detail? 3. Was the exposure measured in a valid and reliable way? 4. Were objective, standard criteria used for measurement of the condition? 5. Were confounding factors identified? 6. Were strategies to deal with confounding factors stated? 7. Were the outcomes measured in a valid and reliable way? 8. Was appropriate statistical analysis used? yes: 1, no/ unclear/ not applicable: 0

**Table S6. The Cochrane Collaboration’s tool for risk of bias in randomized control trials (RoB 2 tool) (n=1)**

| <b>Domain</b>                                                           | <b>Signalling question</b>                                                                                                                                             | <b>Response</b>      |
|-------------------------------------------------------------------------|------------------------------------------------------------------------------------------------------------------------------------------------------------------------|----------------------|
| <b>Bias arising from the randomization process</b>                      | 1.1 Was the allocation sequence random?                                                                                                                                | Y                    |
|                                                                         | 1.2 Was the allocation sequence concealed until participants were enrolled and assigned to interventions?                                                              | PY                   |
|                                                                         | 1.3 Did baseline differences between intervention groups suggest a problem with the randomization process?                                                             | N                    |
|                                                                         | <b>Risk of bias judgement</b>                                                                                                                                          | <b>Low</b>           |
| <b>Domain S: Risk of bias arising from period and carryover effects</b> | S.1 Was the number of participants allocated to each of the two sequences equal or nearly equal?                                                                       | NI                   |
|                                                                         | S.2 If N/PN/NI to S.1: Were period effects accounted for in the analysis?                                                                                              | NI                   |
|                                                                         | S.3 Was there sufficient time for any carryover effects to have disappeared before outcome assessment in the second period?                                            | NI                   |
|                                                                         | <b>Risk of bias judgement</b>                                                                                                                                          | <b>Some concerns</b> |
| <b>Bias due to deviations from intended interventions</b>               | 2.1. Were participants aware of their assigned intervention during the trial?                                                                                          | PY                   |
|                                                                         | 2.2. Were carers and people delivering the interventions aware of participants' assigned intervention during the trial?                                                | PY                   |
|                                                                         | 2.3. If Y/PY/NI to 2.1 or 2.2: Were there deviations from the intended intervention that arose because of the experimental context?                                    | N                    |
|                                                                         | 2.4 If Y/PY to 2.3: Were these deviations likely to have affected the outcome?                                                                                         | NA                   |
|                                                                         | 2.5. If Y/PY/NI to 2.4: Were these deviations from intended intervention balanced between groups?                                                                      | NA                   |
|                                                                         | 2.6 Was an appropriate analysis used to estimate the effect of assignment to intervention?                                                                             | Y                    |
|                                                                         | 2.7 If N/PN/NI to 2.6: Was there potential for a substantial impact (on the result) of the failure to analyse participants in the group to which they were randomized? | NA                   |
|                                                                         | <b>Risk of bias judgement</b>                                                                                                                                          | <b>Low</b>           |
| <b>Bias due to missing outcome data</b>                                 | 3.1 Were data for this outcome available for all, or nearly all, participants randomized?                                                                              | N                    |
|                                                                         | 3.2 If N/PN/NI to 3.1: Is there evidence that result was not biased by missing outcome data?                                                                           | N                    |
|                                                                         | 3.3 If N/PN to 3.2: Could missingness in the outcome depend on its true value?                                                                                         | N                    |
|                                                                         | 3.4 If Y/PY/NI to 3.3: Is it likely that missingness in the outcome depended on its true value?                                                                        | NA                   |
|                                                                         | <b>Risk of bias judgement</b>                                                                                                                                          | <b>Low</b>           |

| <b>Domain</b>                                   | <b>Signalling question</b>                                                                                                                                                          | <b>Response</b>      |
|-------------------------------------------------|-------------------------------------------------------------------------------------------------------------------------------------------------------------------------------------|----------------------|
| <b>Bias in measurement of the outcome</b>       | 4.1 Was the method of measuring the outcome inappropriate?                                                                                                                          | N                    |
|                                                 | 4.2 Could measurement or ascertainment of the outcome have differed between intervention groups?                                                                                    | N                    |
|                                                 | 4.3 Were outcome assessors aware of the intervention received by study participants?                                                                                                | NI                   |
|                                                 | 4.4 If Y/PY/NI to 4.3: Could assessment of the outcome have been influenced by knowledge of intervention received?                                                                  | PN                   |
|                                                 | 4.5 If Y/PY/NI to 4.4: Is it likely that assessment of the outcome was influenced by knowledge of intervention received?                                                            | NA                   |
|                                                 | <b>Risk of bias judgement</b>                                                                                                                                                       | <b>Low</b>           |
| <b>Bias in selection of the reported result</b> | 5.1 Were the data that produced this result analysed in accordance with a pre-specified analysis plan that was finalized before unblinded outcome data were available for analysis? | PY                   |
|                                                 | 5.2 ... multiple eligible outcome measurements (e.g. scales, definitions, time points) within the outcome domain?                                                                   | N                    |
|                                                 | 5.3 ... multiple eligible analyses of the data?                                                                                                                                     | N                    |
|                                                 | 5.4 Is a result based on data from both periods sought, but unavailable on the basis of carryover having been identified?                                                           | N                    |
|                                                 | <b>Risk of bias judgement</b>                                                                                                                                                       | <b>Low</b>           |
| <b>Overall bias</b>                             | <b>Risk of bias judgement</b>                                                                                                                                                       | <b>Some concerns</b> |

## References

1. Azevedo VZ, Dall'Alba V. Fructose intake is not associated to the risk of hepatic fibrosis in patients with Non-Alcoholic Fatty Liver Disease (NAFLD). *Clinical Nutrition*. 2021;40(6):4275-83.
2. Barker K, Davy B. Is Consumption of Ultra-Processed Foods Associated with Cardiometabolic Risk? *Scan's Pulse*. 2021;41(1):1-5.
3. Choi YI. Prospective association between ultra-processed food consumption and risk of non-alcoholic fatty liver disease: A nationwide long-term follow up study. *United European Gastroenterology Journal*. 2020;8(8 SUPPL):125.
4. Cloward J, vliet Sv. Consumption of an Ultra-Processed Diet Negatively Alters Biomarkers of Metabolic Health Compared to An Unprocessed Diet: A 4-Week Randomized Controlled Diet...The Academy of Nutrition and Dietetics Food & Nutrition Conference & Expo, October 8-11, 2022, Orlando, Florida. *Journal of the Academy of Nutrition & Dietetics*. 2022;122(10):A123-A.
5. Dehghanseresht N, Jafarirad S, Alavinejad SP, Mansoori A. Association of the dietary patterns with the risk of non-alcoholic fatty liver disease among Iranian population: a case-control study. *Nutrition Journal*. 2020;19(1):63.
6. Duval C, Rouillier MA, Rabasa-Lhoret R, Karelis AD. High Intensity Exercise: Can It Protect You from A Fast Food Diet? *Nutrients*. 2017;9(9):943.
7. Eslamian G, Shakeri M. Dietary patterns in relation to nonalcoholic fatty liver disease [Conference Abstract]. *Hepatitis Monthly*. 2017;17:32.
8. Fakhoury-Sayegh N, Younes H, Heraoui GNHA, Sayegh R. Nutritional profile and dietary patterns of lebanese non-alcoholic fatty liver disease patients: A case-control study. *Nutrients*. 2017;9(11):1245.
9. Gadgil MD, Anderson CAM, Kandula NR, Kanaya AM. Dietary patterns are associated with metabolic risk factors in south Asians living in the United States. *Journal of Nutrition*. 2015;145(6):1211-7.
10. Giacomello L, Bordignon S, Salm D, Donatello N, Belmonte LA, Bobinski F, et al. Effects of the application of a food processing-based classification system in obese women: a randomized controlled pilot study. *Nutrition and health (Berkhamsted, Hertfordshire)*. 2023;7:2601060231153947.
11. Griffin J, Albaloul A, Kopytek A, Elliott P, Frost G. Effect of ultraprocessed food intake on cardiometabolic risk is mediated by diet quality: a cross-sectional study. *BMJ Nutr Prev Health*. 2021;4(1):174-80.
12. Heidemann C, Scheidt-Nave C, Richter A, Mensink GB. Dietary patterns are associated with cardiometabolic risk factors in a representative study population of German adults. *Br J Nutr*. 2011;106(8):1253-62.
13. Hosseini Z, Rostami M, Whiting SJ, Vatanparast H. Fast-Food Dietary Pattern Is Linked to Higher Prevalence of Metabolic Syndrome in Older Canadian Adults. *J Nutr Metab*. 2021;2021:5712844.
14. Hu E, Capelli G, Saeian K, Loy V, Trivella J, Esteban JP. FREQUENT FAST FOOD CONSUMPTION IS ASSOCIATED WITH MORE SEVERE NON-ALCOHOLIC FATTY LIVER DISEASE, WHILE HIGH-QUALITY, HOME-PREPARED MEALS MAY BE PROTECTIVE [Conference Abstract]. *Gastroenterology*. 2022;162(7):S1207-S8.

15. Johnson-Down L, Labonte ME, Martin ID, Tsuji LJ, Nieboer E, Dewailly E, et al. Quality of diet is associated with insulin resistance in the Cree (Eeyouch) indigenous population of northern Québec. *Nutr Metab Cardiovasc Dis*. 2015;25(1):85-92.
16. Juul F, Vaidean G, Lin Y, Deierlein AL, Parekh N. Ultra-Processed Foods and Incident Cardiovascular Disease in the Framingham Offspring Study. *Journal of the American College of Cardiology*. 2021;77(12):1520-31.
17. Kardashian A, Dodge JL, Terrault NA. Quantifying the Negative Impact of Fast-Food Consumption on Liver Steatosis Among U.S. Adults in the General Population. *Official journal of the American College of Gastroenterology*. 2022;117(10):e896-e7.
18. Kardashian A, Dodge JL, Terrault NA. Quantifying the Negative Impact of Fast-food Consumption on Liver Steatosis Among United States Adults with Diabetes and Obesity. *Clinical Gastroenterology and Hepatology*. 2023;S1542-3565(22):01137-5.
19. Konieczna J, Morey M, Abete I, Bes-Rastrollo M, Ruiz-Canela M, Vioque J, et al. Contribution of ultra-processed foods in visceral fat deposition and other adiposity indicators: Prospective analysis nested in the PREDIMED-Plus trial. *Clin Nutr*. 2021;40(6):4290-300.
20. Krupp K, Adsul P, Wilcox ML, Srinivas V, Frank E, Srinivas A, et al. Prevalence and correlates of metabolic syndrome among rural women in Mysore, India. *Indian Heart J*. 2020;72(6):582-8.
21. Kurniawan AL, Hsu CY, Lee HA, Rau HH, Paramastri R, Syauqy A, et al. Comparing two methods for deriving dietary patterns associated with risk of metabolic syndrome among middle-aged and elderly Taiwanese adults with impaired kidney function. *BMC Med Res Methodol*. 2020;20(1):255.
22. Lee YQ, Whitton C, Neelakantan N, van Dam RM, Chong MFF. Dietary patterns and predicted 10-year cardiovascular disease risk in a multiethnic Asian population. *Nutrition Metabolism and Cardiovascular Diseases*. 2022;32(9):2093-104.
23. Longo GZ, Ordaz KD, da Silva DCG, Hinnig PF, Roberto DMT, Reinert C, et al. Dietary patterns and cardiovascular risk factors among Brazilians: A population-based study in Viçosa, Minas Gerais. *Nutrition*. 2022;98:111626.
24. Martinez-Perez C, San-Cristobal R, Guallar-Castillon P, Martínez-González M, Salas-Salvadó J, Corella D, et al. Use of Different Food Classification Systems to Assess the Association between Ultra-Processed Food Consumption and Cardiometabolic Health in an Elderly Population with Metabolic Syndrome (PREDIMED-Plus Cohort). *Nutrients*. 2021;13(7):2471.
25. Migliaretti G, Ame C, Ciullo S, Fontana E, Stura I, Nano E, et al. Metabolic and psychological effects of short-term increased consumption of less-processed foods in daily diets: a Pilot Study. *Diabetes & metabolism*. 2020;46(1):66-9.
26. Naja F, Nasreddine L, Itani L, Adra N, Sibai A, Hwalla N. Association between dietary patterns and the risk of metabolic syndrome among Lebanese adults. *European Journal of Nutrition*. 2013;52(1):97-105.
27. Nakashita C, Xi L, Inoue Y, Kabura R, Masuda S, Yamano Y, et al. Impact of dietary compositions and patterns on the prevalence of nonalcoholic fatty liver disease in Japanese men: a cross-sectional study. *BMC Gastroenterology*. 2021;21(1):342.
28. Odegaard AO, Jacobs DR, Van Wagner LB, Pereira MA. Levels of abdominal adipose tissue and metabolic-associated fatty liver disease (MAFLD) in middle age according to average fast-food intake over the preceding 25 years: the CARDIA Study. *American Journal of Clinical Nutrition*. 2022;116(1):255-62.

29. Kalafati IP, Borsa D, Dimitriou M, Revenas K, Kokkinos A, Dedoussis GV. Dietary patterns and non-alcoholic fatty liver disease in a Greek case-control study. *Nutrition*. 2019;61:105-10.
30. Lopes Pinto S, da Silva DCG, Bressan J. Absolute and Relative Changes in Ultra-processed Food Consumption and Dietary Antioxidants in Severely Obese Adults 3 Months After Roux-en-Y Gastric Bypass. *Obes Surg*. 2019;29(6):1810-5.
31. Santana GJ, Silva NJ, Costa JO, Vásquez CMP, Vila-Nova TMS, Vieira D, et al. Contribution of minimally processed and ultra-processed foods to the cardiometabolic risk of Brazilian young adults: a cross-sectional study. *Nutr Hosp*. 2021;38(2):328-36.
32. Sayegh NF, Heraoui G, Younes H, Sayegh LN, Boulos C, Sayegh R. Relation of Dietary Patterns and Nutritional Profile to Hepatic Fibrosis in a Sample of Lebanese Non-Alcoholic Fatty Liver Disease Patients. *Nutrients*. 2022;14(12):2554.
33. Talenezhad N, Mirzavandi F, Rahimpour S, Amel Shahbaz AP, Mohammadi M, Hosseinzadeh M. Empirically derived dietary pattern and odds of non-alcoholic fatty liver diseases in overweight and obese adults: a case-control study. *BMC Gastroenterol*. 2022;22(1):158.
34. Ushula TW, Mamun A, Darssan D, Wang WYS, Williams GM, Whiting SJ, et al. Dietary patterns and the risks of metabolic syndrome and insulin resistance among young adults: Evidence from a longitudinal study. *Clin Nutr*. 2022;41(7):1523-31.
35. Walker MS, Tarasiuk FS, Gustavo AS, Oliveira MS, Donadio MVF, Feoli AMP. Lifestyle improvement reduces the consumption of ultra-processed foods in adults with metabolic syndrome. *Nutrition, metabolism, and cardiovascular diseases*. 2022;32(8):1990-7.
36. Yin X, Chen Y, Lu W, Jin T, Li L. Association of dietary patterns with the newly diagnosed diabetes mellitus and central obesity: a community based cross-sectional study. *Nutr Diabetes*. 2020;10(1):16.
37. Zhang T, Gan S, Ye M, Meng G, Zhang Q, Liu L, et al. Association between consumption of ultra-processed foods and hyperuricemia: TCLSIH prospective cohort study. *Nutrition, Metabolism and Cardiovascular Diseases*. 2021;31(7):1993-2003.
38. Zhang ZF, Jackson SL, Martinez E, Gillespie C, Yang QH. Association between ultraprocessed food intake and cardiovascular health in US adults: a cross-sectional analysis of the NHANES 2011-2016. *American Journal of Clinical Nutrition*. 2021;113(2):428-36.
